# Supplementary material for: A lytic transglycosylase connects bacterial focal adhesion complexes to the peptidoglycan cell wall
Source: eLife journal article supplement (doi:10.7554/elife.99273), 2024-07-16

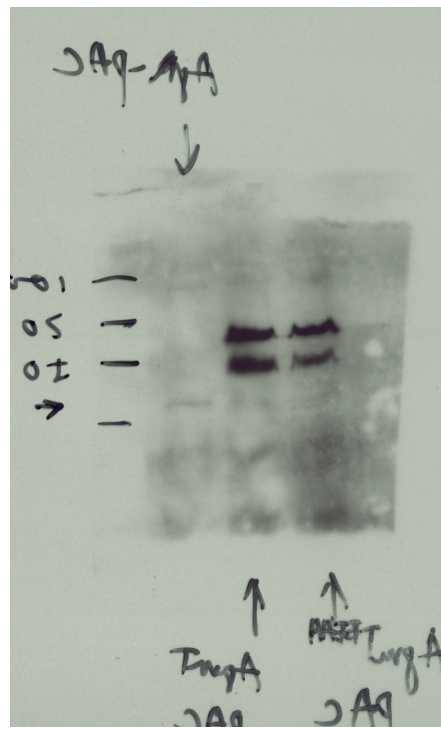

Supplement: fig5-data1 [file elife-99273-fig5-data1-v1.pdf]
