# Supplementary material for: A lytic transglycosylase connects bacterial focal adhesion complexes to the peptidoglycan cell wall
Source: eLife journal article supplement (doi:10.7554/elife.99273), 2024-07-16
Supplement: fig5-data3 [file elife-99273-fig5-data3-v1.pdf]

Scanned

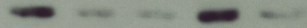

pellet → Lysosome<sup>-</sup>
