# Supplementary material for: A lytic transglycosylase connects bacterial focal adhesion complexes to the peptidoglycan cell wall
Source: eLife. 2024 Oct 1;13:RP99273. doi: 10.7554/eLife.99273 (PMC11444678; doi:10.7554/eLife.99273)
Supplement: Figure 2—source data 1. [file elife-99273-fig2-data1.xlsx]

## Sheet: Sheet1
Strain	Velocity (um/min)
pilA	1.30686
pilA	1.29188
pilA	0.698075
pilA	0.517215
pilA	1.76492
pilA	2.60035
pilA	1.14152
pilA	0.688756
pilA	1.49686
pilA	1.53379
pilA	0.618222
pilA	0.697457
pilA	0.509562
pilA	1.47546
pilA	0.778942
pilA	1.19843
pilA	1.51429
pilA	1.37702
pilA	1.35375
pilA	1.67905
pilA	1.34574
pilA	0.79033
pilA	3.78675
pilA	1.65857
pilA	2.82633
pilA	3.07908
pilA	1.7468
pilA	1.87411
pilA	3.772
pilA	3.18982
pilA	3.14167
pilA	3.00351
pilA	4.2315
pilA	1.83609
pilA	2.57097
pilA	4.57235
pilA	3.24426
pilA	4.93932
pilA	3.87086
pilA	3.25556
pilA	4.2459
pilA	5.02585
pilA	1.99831
pilA	4.85559
pilA	3.94982
pilA	2.79896
deltaagmT pilA	1.3342
deltaagmT pilA	1.6865
deltaagmT pilA	0.715429
deltaagmT pilA	0.6152
deltaagmT pilA	0.684988
deltaagmT pilA	1.1346
deltaagmT pilA	0.985831
deltaagmT pilA	0.649423
deltaagmT pilA	1.35667
deltaagmT pilA	0.794647
deltaagmT pilA	1.0969
deltaagmT pilA	0.596074
deltaagmT pilA	2.06575
deltaagmT pilA	0.469452
deltaagmT pilA	1.20127
deltaagmT pilA	0.620276
deltaagmT pilA	1.784
deltaagmT pilA	0.839184
deltaagmT pilA	1.1697
deltaagmT pilA	1.6406
deltaagmT pilA	2.35489
deltaagmT pilA	0.410526
deltaagmT pilA	0.612022
deltaagmT pilA	0.277807
deltaagmT pilA	0.779112
deltaagmT pilA	0.544325
deltaagmT pilA	1.064
deltaagmT pilA	0.285379
deltaagmT pilA	0.147465
deltaagmT pilA	0.267436
deltaagmT pilA	0.522615
deltaagmT pilA	0.342756
deltaagmT pilA	0.424024
deltaagmT pilA	0.213333
deltaagmT pilA	0.14617
deltaagmT pilA	0.858986
deltaagmT pilA	0.490323
deltaagmT pilA	0.349064
deltaagmT pilA	0.53576
deltaagmT pilA	0.48
deltaagmT pilA	0.26158
deltaagmT pilA	1.5697
deltaagmT pilA	0.7192
deltaagmT pilA	1.05
deltaagmT pilA	1.1205
deltaagmT pilA	0.57975
deltaagmT pilA	0.621016
deltaagmT pilA	0.904
deltaagmT pilA	0.121333
deltaagmT pilA	1.19775
deltaagmT pilA	1.42892
deltaagmT pilA	1.01803
deltaagmT pilA	0.833573
deltaagmT pilA	1.0234
deltaagmT pilA	1.3095
deltaagmT pilA	0.557557
deltaagmT pilA	1.17143
deltaagmT pilA	0.257441
deltaagmT pilA	3.76471
agmT pilA mltG0uMvan	3.05313
agmT pilA mltG0uMvan	2.303
agmT pilA mltG0uMvan	2.50408
agmT pilA mltG0uMvan	3.7452
agmT pilA mltG0uMvan	3.38095
agmT pilA mltG0uMvan	2.17793
agmT pilA mltG0uMvan	3.4664
agmT pilA mltG0uMvan	3.77039
agmT pilA mltG0uMvan	3.5774
agmT pilA mltG0uMvan	3.08438
agmT pilA mltG0uMvan	2.79309
agmT pilA mltG0uMvan	2.584
agmT pilA mltG0uMvan	2.22772
agmT pilA mltG0uMvan	2.90505
agmT pilA mltG0uMvan	1.87097
agmT pilA mltG0uMvan	3.31594
agmT pilA mltG0uMvan	2.4572
agmT pilA mltG0uMvan	2.19309
agmT pilA mltG0uMvan	2.6327
agmT pilA mltG0uMvan	3.1455
agmT pilA mltG0uMvan	3.2438
agmT pilA mltG0uMvan	3.21
agmT pilA mltG0uMvan	1.97123
agmT pilA mltG0uMvan	2.8049
agmT pilA mltG0uMvan	3.2525
agmT pilA mltG0uMvan	2.91555
agmT pilA mltG0uMvan	1.0427
agmT pilA mltG0uMvan	2.55527
agmT pilA mltG0uMvan	3.05983
agmT pilA mltG0uMvan	2.988
agmT pilA mltG0uMvan	4.31679
agmT pilA mltG0uMvan	4.1523
agmT pilA mltG0uMvan	1.9
agmT pilA mltG0uMvan	1.59298
agmT pilA mltG0uMvan	2.66117
agmT pilA mltG0uMvan	1.26161
agmT pilA mltG0uMvan	1.7099
agmT pilA mltG0uMvan	2.62744
agmT pilA mltG0uMvan	2.62007
agmT pilA mltG0uMvan	2.61423
agmT pilA mltG0uMvan	1.63011
agmT pilA mltG0uMvan	3.0676
agmT pilA mltG0uMvan	1.64914
agmT pilA mltG0uMvan	3.60412
agmT pilA mltG200uMvan	4.01871
agmT pilA mltG200uMvan	5.55142
agmT pilA mltG200uMvan	3.35552
agmT pilA mltG200uMvan	4.49855
agmT pilA mltG200uMvan	3.84311
agmT pilA mltG200uMvan	4.84335
agmT pilA mltG200uMvan	3.75035
agmT pilA mltG200uMvan	4.0162
agmT pilA mltG200uMvan	3.72921
agmT pilA mltG200uMvan	5.30424
agmT pilA mltG200uMvan	2.3734
agmT pilA mltG200uMvan	4.41674
agmT pilA mltG200uMvan	2.43716
agmT pilA mltG200uMvan	3.27486
agmT pilA mltG200uMvan	2.77138
agmT pilA mltG200uMvan	2.78942
agmT pilA mltG200uMvan	2.36807
agmT pilA mltG200uMvan	3.271
agmT pilA mltG200uMvan	1.94335
agmT pilA mltG200uMvan	2.00255
agmT pilA mltG200uMvan	3.1424
agmT pilA mltG200uMvan	3.09647
agmT pilA mltG200uMvan	1.9925
agmT pilA mltG200uMvan	1.54902
agmT pilA mltG200uMvan	3.5145
agmT pilA mltG200uMvan	2.70852
agmT pilA mltG200uMvan	2.65956
agmT pilA mltG200uMvan	3.00712
agmT pilA mltG200uMvan	2.07677
agmT pilA mltG200uMvan	3.18801
agmT pilA mltG200uMvan	2.21062
agmT pilA mltG200uMvan	3.429
agmT pilA mltG200uMvan	1.4833
agmT pilA mltG200uMvan	2.18126
agmT pilA mltG200uMvan	2.06114
agmT pilA mltG200uMvan	2.14956
agmT pilA mltG200uMvan	1.8528
agmT pilA mltG200uMvan	1.21871
agmT pilA mltG200uMvan	1.64533
agmT pilA mltG200uMvan	2.2545
agmT pilA mltG200uMvan	4.75361
agmT pilA mltG200uMvan	2.5053
agmT pilA mltG200uMvan	4.867
agmT pilA mltG200uMvan	4.00817
agmT pilA mltG200uMvan	3.53004
agmT pilA mltG200uMvan	3.69647
agmT pilA mltG200uMvan	4.27971
agmT pilA mltG200uMvan	4.234
agmT pilA mltG200uMvan	3.86212
agmT pilA mltG200uMvan	4.5394
agmT pilA mltG200uMvan	2.54839
