# Supplementary material for: A lytic transglycosylase connects bacterial focal adhesion complexes to the peptidoglycan cell wall
Source: eLife. 2024 Oct 1;13:RP99273. doi: 10.7554/eLife.99273 (PMC11444678; doi:10.7554/eLife.99273)
Supplement: Figure 2—source data 2. [file elife-99273-fig2-data2.xlsx]

## Sheet: Sheet1
Strain	Distance (um)
pilA	9.148
pilA	6.679
pilA	6.164
pilA	2.674
pilA	9.407
pilA	7.359
pilA	9.897
pilA	4.594
pilA	10.972
pilA	13.298
pilA	5.564
pilA	6.856
pilA	3.144
pilA	5.651
pilA	7.657
pilA	8.389
pilA	3.286
pilA	8.028
pilA	9.923
pilA	15.951
pilA	4.266
pilA	6.457
pilA	27.151
pilA	5.805
pilA	8.479
pilA	22.077
pilA	4.367
pilA	6.878
pilA	3.772
pilA	5.327
pilA	9.425
pilA	20.514
pilA	8.463
pilA	2.442
pilA	5.579
pilA	9.922
pilA	5.937
pilA	5.779
pilA	13.548
pilA	3.809
pilA	7.77
pilA	19.249
pilA	10.651
pilA	17.82
pilA	11.178
pilA	13.519
agmT pilA	5.11
agmT pilA	3.373
agmT pilA	2.504
agmT pilA	3.076
agmT pilA	2.966
agmT pilA	4.164
agmT pilA	3.618
agmT pilA	2.812
agmT pilA	2.035
agmT pilA	3.711
agmT pilA	4.607
agmT pilA	2.581
agmT pilA	8.263
agmT pilA	1.798
agmT pilA	3.796
agmT pilA	1.346
agmT pilA	0.892
agmT pilA	4.112
agmT pilA	0.386
agmT pilA	2.182
agmT pilA	3.132
agmT pilA	0.546
agmT pilA	1.12
agmT pilA	1.064
agmT pilA	2.984
agmT pilA	2.542
agmT pilA	1.064
agmT pilA	1.093
agmT pilA	0.32
agmT pilA	1.158
agmT pilA	1.479
agmT pilA	0.97
agmT pilA	1.412
agmT pilA	0.64
agmT pilA	0.706
agmT pilA	1.864
agmT pilA	1.064
agmT pilA	0.932
agmT pilA	2.502
agmT pilA	0.48
agmT pilA	0.96
agmT pilA	0.518
agmT pilA	1.798
agmT pilA	1.575
agmT pilA	2.241
agmT pilA	2.319
agmT pilA	2.689
agmT pilA	1.356
agmT pilA	0.546
agmT pilA	4.791
agmT pilA	1.186
agmT pilA	1.863
agmT pilA	3.476
agmT pilA	4.943
agmT pilA	2.619
agmT pilA	2.693
agmT pilA	5.658
agmT pilA	0.986
agmT pilA	0.64
agmT pilA mltG0uMvan	11.205
agmT pilA mltG0uMvan	11.515
agmT pilA mltG0uMvan	10.442
agmT pilA mltG0uMvan	18.726
agmT pilA mltG0uMvan	16.33
agmT pilA mltG0uMvan	7.993
agmT pilA mltG0uMvan	17.332
agmT pilA mltG0uMvan	8.785
agmT pilA mltG0uMvan	17.887
agmT pilA mltG0uMvan	10.271
agmT pilA mltG0uMvan	6.061
agmT pilA mltG0uMvan	3.876
agmT pilA mltG0uMvan	5.948
agmT pilA mltG0uMvan	9.209
agmT pilA mltG0uMvan	4.06
agmT pilA mltG0uMvan	16.016
agmT pilA mltG0uMvan	6.143
agmT pilA mltG0uMvan	4.759
agmT pilA mltG0uMvan	9.662
agmT pilA mltG0uMvan	11.544
agmT pilA mltG0uMvan	32.438
agmT pilA mltG0uMvan	27.285
agmT pilA mltG0uMvan	12.813
agmT pilA mltG0uMvan	17.755
agmT pilA mltG0uMvan	6.505
agmT pilA mltG0uMvan	8.251
agmT pilA mltG0uMvan	10.427
agmT pilA mltG0uMvan	15.766
agmT pilA mltG0uMvan	3.58
agmT pilA mltG0uMvan	7.47
agmT pilA mltG0uMvan	42.434
agmT pilA mltG0uMvan	11.751
agmT pilA mltG0uMvan	4.75
agmT pilA mltG0uMvan	14.066
agmT pilA mltG0uMvan	15.967
agmT pilA mltG0uMvan	11.14
agmT pilA mltG0uMvan	12.26
agmT pilA mltG0uMvan	17.525
agmT pilA mltG0uMvan	22.716
agmT pilA mltG0uMvan	6.98
agmT pilA mltG0uMvan	16.024
agmT pilA mltG0uMvan	7.669
agmT pilA mltG0uMvan	5.772
agmT pilA mltG0uMvan	9.623
agmT pilA mltG200uMvan	16.758
agmT pilA mltG200uMvan	17.598
agmT pilA mltG200uMvan	10.637
agmT pilA mltG200uMvan	21.728
agmT pilA mltG200uMvan	10.876
agmT pilA mltG200uMvan	11.285
agmT pilA mltG200uMvan	16.239
agmT pilA mltG200uMvan	20.081
agmT pilA mltG200uMvan	9.957
agmT pilA mltG200uMvan	15.011
agmT pilA mltG200uMvan	11.867
agmT pilA mltG200uMvan	10.291
agmT pilA mltG200uMvan	8.92
agmT pilA mltG200uMvan	11.462
agmT pilA mltG200uMvan	7.843
agmT pilA mltG200uMvan	17.657
agmT pilA mltG200uMvan	15.795
agmT pilA mltG200uMvan	32.71
agmT pilA mltG200uMvan	4.528
agmT pilA mltG200uMvan	11.014
agmT pilA mltG200uMvan	7.856
agmT pilA mltG200uMvan	8.763
agmT pilA mltG200uMvan	18.59
agmT pilA mltG200uMvan	11.881
agmT pilA mltG200uMvan	14.058
agmT pilA mltG200uMvan	8.586
agmT pilA mltG200uMvan	11.968
agmT pilA mltG200uMvan	8.029
agmT pilA mltG200uMvan	13.499
agmT pilA mltG200uMvan	16.482
agmT pilA mltG200uMvan	14.369
agmT pilA mltG200uMvan	3.429
agmT pilA mltG200uMvan	14.833
agmT pilA mltG200uMvan	14.898
agmT pilA mltG200uMvan	7.214
agmT pilA mltG200uMvan	12.188
agmT pilA mltG200uMvan	14.211
agmT pilA mltG200uMvan	5.082
agmT pilA mltG200uMvan	7.404
agmT pilA mltG200uMvan	14.271
agmT pilA mltG200uMvan	7.891
agmT pilA mltG200uMvan	7.09
agmT pilA mltG200uMvan	24.335
agmT pilA mltG200uMvan	14.71
agmT pilA mltG200uMvan	9.99
agmT pilA mltG200uMvan	10.461
agmT pilA mltG200uMvan	20.671
agmT pilA mltG200uMvan	16.936
agmT pilA mltG200uMvan	16.723
agmT pilA mltG200uMvan	21.199
agmT pilA mltG200uMvan	5.53
