# Supplementary material for: A lytic transglycosylase connects bacterial focal adhesion complexes to the peptidoglycan cell wall
Source: eLife. 2024 Oct 1;13:RP99273. doi: 10.7554/eLife.99273 (PMC11444678; doi:10.7554/eLife.99273)
Supplement: Figure 3—source data 1. [file elife-99273-fig3-data1.xlsx]

## Sheet: Sheet1
lyzozyme	0.195	0.217	0.23		0.214	0.0176918
WT	0.157	0.143	0.147		0.149	0.0072111
EEAA	0.014	0.007	0.017		0.0126667	0.0051316
