# Supplementary material for: A lytic transglycosylase connects bacterial focal adhesion complexes to the peptidoglycan cell wall
Source: eLife. 2024 Oct 1;13:RP99273. doi: 10.7554/eLife.99273 (PMC11444678; doi:10.7554/eLife.99273)
Supplement: Figure 3—source data 2. [file elife-99273-fig3-data2.xlsx]

## Sheet: L
DZ2	6.91012
DZ2	10.0673
DZ2	8.34214
DZ2	10.6593
DZ2	6.18289
DZ2	6.33133
DZ2	6.60834
DZ2	11.1504
DZ2	5.27036
DZ2	6.08951
DZ2	5.20196
DZ2	5.35599
DZ2	5.82082
DZ2	7.63427
DZ2	5.8792
DZ2	7.39978
DZ2	8.5562
DZ2	12.2969
DZ2	6.27722
DZ2	6.32703
DZ2	9.94991
DZ2	7.50571
DZ2	8.0319
DZ2	6.29976
DZ2	6.38485
DZ2	6.65249
DZ2	7.89483
DZ2	8.34261
DZ2	5.84832
DZ2	5.0401
DZ2	7.0073
DZ2	8.66286
DZ2	6.38568
DZ2	6.59318
DZ2	9.82048
DZ2	10.6925
DZ2	7.53178
DZ2	8.96052
DZ2	8.94399
DZ2	5.88832
DZ2	4.92069
DZ2	5.74405
DZ2	7.70361
DZ2	5.14858
DZ2	8.63109
DZ2	7.73774
DZ2	5.32498
DZ2	6.95842
DZ2	7.0399
DZ2	7.17328
DZ2	8.98149
DZ2	7.34124
DZ2	4.9018
DZ2	6.10039
DZ2	10.8484
DZ2	6.33504
DZ2	6.00056
DZ2	6.02216
DZ2	12.1569
DZ2	4.62295
DZ2	7.03116
DZ2	10.6084
DZ2	7.57326
DZ2	8.50247
DZ2	7.06102
DZ2	9.40716
DZ2	9.10697
DZ2	10.0963
DZ2	5.10052
DZ2	5.78421
DZ2	8.72548
DZ2	7.13445
DZ2	7.7125
DZ2	8.04632
DZ2	9.32334
DZ2	6.8985
DZ2	6.17834
DZ2	7.37258
DZ2	5.75414
DZ2	8.60424
DZ2	11.0315
DZ2	5.71961
DZ2	8.04724
DZ2	6.15107
DZ2	9.58536
DZ2	8.74333
DZ2	6.05373
DZ2	10.8851
DZ2	8.83542
DZ2	5.09393
DZ2	6.47068
DZ2	5.42914
DZ2	4.82302
DZ2	6.68216
DZ2	5.47365
DZ2	9.30262
DZ2	7.29776
DZ2	9.71973
DZ2	8.1345
DZ2	6.36392
DZ2	7.67105
DZ2	9.97655
DZ2	6.0939
DZ2	6.67373
DZ2	5.50894
DZ2	6.05631
DZ2	7.07444
DZ2	11.8458
DZ2	10.368
DZ2	8.03099
DZ2	8.07767
DZ2	5.67573
DZ2	6.04035
DZ2	7.3334
DZ2	5.91253
DZ2	7.45154
DZ2	9.89735
DZ2	5.86534
DZ2	9.13643
DZ2	8.43962
DZ2	7.18743
DZ2	6.33273
DZ2	5.622
DZ2	6.71791
DZ2	5.32588
DZ2	6.30537
DZ2	4.8146
DZ2	6.31052
DZ2	7.73435
DZ2	6.82539
DZ2	5.67133
DZ2	10.667
DZ2	5.44645
DZ2	5.66412
DZ2	4.98856
DZ2	9.96377
DZ2	5.62986
DZ2	7.66999
DZ2	6.58264
DZ2	10.3473
DZ2	11.531
DZ2	7.03984
DZ2	8.87718
DZ2	6.11522
DZ2	7.16938
DZ2	10.24
DZ2	6.62936
DZ2	5.486
DZ2	9.08343
DZ2	6.48188
DZ2	10.0278
DZ2	9.05643
DZ2	9.11927
DZ2	7.03821
DZ2	9.0759
DZ2	5.75035
DZ2	6.86769
DZ2	9.72141
DZ2	6.40016
DZ2	9.42304
DZ2	5.8353
DZ2	6.05603
DZ2	8.35362
DZ2	9.2433
DZ2	11.4899
DZ2	5.54237
DZ2	6.89333
DZ2	5.63991
DZ2	8.26487
DZ2	5.77757
DZ2	6.00285
DZ2	8.89914
DZ2	7.89984
DZ2	5.75558
DZ2	6.49243
DZ2	8.48652
DZ2	7.35045
DZ2	6.07817
DZ2	10.0026
DZ2	4.81901
DZ2	8.68881
DZ2	8.49365
DZ2	5.23022
DZ2	8.81349
DZ2	8.80462
DZ2	5.5015
DZ2	8.1474
DZ2	7.95975
DZ2	5.46426
DZ2	5.33248
DZ2	8.93911
DZ2	8.11401
DZ2	7.12595
DZ2	9.0229
DZ2	11.8817
DZ2	5.39066
DZ2	6.67492
DZ2	3.9198
DZ2	6.54953
DZ2	9.87107
DZ2	6.7973
DZ2	5.89502
DZ2	7.72434
DZ2	6.37374
DZ2	8.06599
DZ2	6.27098
DZ2	7.61681
DZ2	6.21212
DZ2	4.42987
DZ2	5.60482
DZ2	6.99554
DZ2	8.79989
DZ2	7.73293
DZ2	11.4655
DZ2	8.56067
DZ2	7.09386
DZ2	7.77802
DZ2	10.0958
DZ2	5.89507
DZ2	8.5345
DZ2	6.97881
DZ2	6.54978
DZ2	6.61579
DZ2	7.36302
DZ2	5.68348
DZ2	6.76978
DZ2	5.19898
DZ2	6.78012
DZ2	6.16081
DZ2	7.21187
DZ2	6.29413
DZ2	5.35829
DZ2	5.81497
DZ2	8.74561
DZ2	6.89491
DZ2	6.07012
DZ2	7.51717
DZ2	5.96631
DZ2	11.4672
DZ2	9.85672
DZ2	6.63144
DZ2	5.28185
DZ2	9.13475
DZ2	10.0497
DZ2	5.41438
DZ2	6.0829
DZ2	6.02788
DZ2	7.14478
DZ2	6.71821
DZ2	8.26468
DZ2	5.79515
DZ2	10.9203
DZ2	6.0613
DZ2	7.26193
DZ2	8.45
DZ2	9.97707
DZ2	6.34395
DZ2	5.92383
DZ2	5.77832
DZ2	4.92751
DZ2	6.56267
DZ2	7.10545
DZ2	6.38629
DZ2	5.05804
DZ2	7.36039
DZ2	7.57675
DZ2	4.99138
DZ2	8.29425
DZ2	7.45327
DZ2	7.23787
DZ2	7.23707
DZ2	5.41134
DZ2	4.99869
DZ2	6.32934
DZ2	5.13486
DZ2	8.55822
DZ2	5.73005
DZ2	7.6652
DZ2	4.83279
DZ2	5.48818
DZ2	6.78415
DZ2	7.78139
DZ2	10.199
DZ2	6.29492
DZ2	11.7633
DZ2	6.8948
DZ2	6.66135
DZ2	7.17455
DZ2	6.35282
DZ2	11.3217
DZ2	5.60592
DZ2	9.83259
DZ2	7.10622
DZ2	10.1564
DZ2	6.20606
DZ2	7.39829
DZ2	11.1429
DZ2	7.03046
DZ2	6.01379
DZ2	5.45656
DZ2	9.88545
DZ2	6.83996
DZ2	7.27304
DZ2	9.15241
DZ2	5.40879
DZ2	5.82019
DZ2	7.12177
DZ2	11.1665
DZ2	6.68083
DZ2	5.91504
DZ2	5.748
DZ2	5.75308
DZ2	10.0936
DZ2	5.03007
DZ2	6.9364
DZ2	9.50361
DZ2	6.802
DZ2	6.09666
DZ2	5.25002
DZ2	8.06248
DZ2	4.5613
DZ2	7.74597
DZ2	8.15008
DZ2	6.29654
DZ2	5.43371
DZ2	7.03478
DZ2	7.2945
DZ2	6.91993
DZ2	6.33425
DZ2	5.30574
DZ2	8.09387
DZ2	6.49378
DZ2	9.31891
DZ2	10.971
DZ2	8.68952
DZ2	5.43619
DZ2	5.33958
DZ2	10.7797
DZ2	6.58835
DZ2	5.98442
DZ2	5.94429
DZ2	6.31024
DZ2	6.44781
DZ2	8.94457
DZ2	6.26538
DZ2	7.49802
DZ2	6.05099
DZ2	7.04344
DZ2	7.49882
DZ2	6.06547
DZ2	5.50748
DZ2	5.11487
DZ2	5.79997
DZ2	8.4354
DZ2	6.46571
DZ2	6.02827
DZ2	5.87071
DZ2	8.68931
DZ2	7.01918
DZ2	6.71377
DZ2	8.26161
DZ2	7.61459
DZ2	6.85824
DZ2	6.06095
DZ2	7.98368
DZ2	6.42897
DZ2	6.73798
DZ2	7.27723
DZ2	8.24944
DZ2	6.98443
DZ2	8.12964
DZ2	8.8085
DZ2	6.79493
DZ2	6.23402
DZ2	7.15972
DZ2	5.17319
DZ2	6.20171
DZ2	7.93313
DZ2	6.06266
DZ2	8.97734
DZ2	7.20947
DZ2	9.1012
DZ2	7.35604
DZ2	10.2529
DZ2	9.1056
DZ2	10.8979
DZ2	6.86282
DZ2	8.99695
DZ2	5.2875
DZ2	8.3765
DZ2	5.96979
DZ2	7.15288
DZ2	6.495
DZ2	8.38494
DZ2	8.93402
DZ2	6.69221
DZ2	6.05585
DZ2	6.88284
DZ2	7.74052
DZ2	6.58065
DZ2	5.62441
DZ2	4.27694
DZ2	7.29167
DZ2	8.05553
DZ2	5.83275
DZ2	9.51725
DZ2	11.9438
DZ2	6.80149
DZ2	6.46951
DZ2	8.30005
DZ2	8.22457
DZ2	8.83396
DZ2	6.40691
DZ2	9.90935
DZ2	4.6824
DZ2	5.89911
DZ2	5.10831
DZ2	6.61787
DZ2	4.95009
DZ2	3.70492
DZ2	7.56231
DZ2	6.70894
DZ2	4.96509
DZ2	7.28913
DZ2	8.38373
DZ2	5.95439
DZ2	11.1872
DZ2	7.47953
DZ2	6.34297
DZ2	7.45848
DZ2	6.15781
DZ2	7.04746
DZ2	7.80126
DZ2	7.51199
DZ2	9.68003
DZ2	5.97979
DZ2	6.7793
DZ2	4.94273
DZ2	9.11764
DZ2	7.47887
DZ2	7.23525
DZ2	6.92995
DZ2	8.73368
DZ2	6.48132
DZ2	5.2026
DZ2	7.80467
DZ2	5.36829
DZ2	5.60902
DZ2	7.95775
DZ2	7.15386
DZ2	5.38192
DZ2	5.67592
DZ2	6.23672
DZ2	9.24658
DZ2	6.01485
DZ2	8.84874
DZ2	5.32547
DZ2	7.90799
DZ2	10.7605
DZ2	5.64376
DZ2	8.54277
DZ2	6.33863
DZ2	6.84126
DZ2	10.7474
DZ2	6.55852
DZ2	6.91833
DZ2	4.89094
DZ2	6.60615
DZ2	5.68075
DZ2	8.691
DZ2	9.38413
DZ2	6.16839
DZ2	8.58952
DZ2	6.68922
DZ2	7.08636
DZ2	7.47335
DZ2	7.29503
DZ2	6.43481
DZ2	9.48659
DZ2	6.82877
DZ2	12.106
DZ2	7.98818
DZ2	7.00761
DZ2	5.80534
DZ2	5.7124
DZ2	6.43412
DZ2	4.54883
DZ2	6.43363
DZ2	6.63776
DZ2	5.98284
DZ2	5.85708
DZ2	6.65999
DZ2	6.46303
DZ2	6.89434
DZ2	6.40724
DZ2	10.5467
DZ2	6.7612
DZ2	6.66835
DZ2	8.32841
DZ2	12.4531
DZ2	7.51566
DZ2	5.0787
DZ2	6.52414
DZ2	8.99732
DZ2	6.20723
DZ2	9.32295
DZ2	7.89726
DZ2	10.7651
DZ2	6.29152
DZ2	8.68206
DZ2	6.64701
DZ2	6.41955
DZ2	6.23212
DZ2	9.06053
DZ2	7.22276
DZ2	7.12715
DZ2	6.78653
DZ2	5.94625
DZ2	6.80397
DZ2	7.087
DZ2	8.26032
DZ2	6.17723
DZ2	5.368
DZ2	6.49146
DZ2	5.07788
DZ2	5.49989
DZ2	4.47906
DZ2	7.45355
DZ2	5.06728
DZ2	7.29171
DZ2	6.17578
DZ2	7.05196
DZ2	8.07585
DZ2	10.4798
DZ2	6.52859
DZ2	6.47221
DZ2	5.66402
DZ2	7.76937
DZ2	6.15266
DZ2	8.52307
DZ2	5.89871
DZ2	8.96976
DZ2	5.97462
DZ2	6.9341
DZ2	7.24605
DZ2	6.70531
DZ2	4.28086
DZ2	5.8895
DZ2	5.42042
DZ2	4.9339
DZ2	6.03906
DZ2	6.98486
DZ2	6.01426
DZ2	5.40892
DZ2	7.05315
DZ2	5.65631
DZ2	6.1139
DZ2	7.94465
DZ2	6.87226
DZ2	8.99851
DZ2	5.49682
DZ2	6.49507
DZ2	5.17786
DZ2	6.52761
DZ2	7.5728
DZ2	8.80847
DZ2	6.56587
DZ2	5.87603
DZ2	5.59477
DZ2	9.54857
DZ2	9.14322
DZ2	6.56285
DZ2	7.2892
DZ2	10.3789
DZ2	6.94199
DZ2	5.99835
DZ2	6.23666
DZ2	5.41012
DZ2	8.19499
DZ2	4.96143
DZ2	7.78915
DZ2	5.98609
DZ2	5.0685
DZ2	7.71134
DZ2	7.55746
DZ2	6.49736
DZ2	6.65259
DZ2	9.59442
DZ2	5.78772
DZ2	4.43636
DZ2	9.96106
DZ2	5.81868
DZ2	7.57496
DZ2	6.81002
DZ2	5.88339
DZ2	9.9586
DZ2	9.37942
DZ2	7.18414
DZ2	8.39448
DZ2	4.84903
DZ2	5.20629
DZ2	6.03767
DZ2	5.1901
DZ2	5.69119
DZ2	5.59043
DZ2	7.50219
DZ2	9.67545
DZ2	6.99718
DZ2	5.8316
DZ2	7.331
DZ2	9.66429
DZ2	9.08166
DZ2	6.97756
DZ2	5.59662
DZ2	7.30387
DZ2	6.64534
DZ2	6.158
DZ2	7.30844
DZ2	4.34672
DZ2	5.49302
DZ2	5.6206
DZ2	6.53957
DZ2	5.54823
DZ2	8.53974
DZ2	6.9137
DZ2	8.72703
DZ2	7.0169
DZ2	6.78268
DZ2	5.92729
DZ2	5.88586
DZ2	5.22405
DZ2	7.96702
DZ2	7.47443
DZ2	5.95605
DZ2	7.32889
DZ2	7.49025
DZ2	5.26174
DZ2	9.83275
DZ2	6.59371
DZ2	5.35972
DZ2	4.04137
DZ2	6.29446		7.18838	1.66426
agmT	6.06109
agmT	5.92931
agmT	5.43637
agmT	10.0385
agmT	5.18353
agmT	6.19401
agmT	6.4791
agmT	7.22
agmT	6.08356
agmT	8.51136
agmT	6.49792
agmT	6.70373
agmT	6.11424
agmT	5.44291
agmT	5.88769
agmT	7.84459
agmT	6.00064
agmT	3.30936
agmT	7.5232
agmT	6.03545
agmT	5.42802
agmT	5.25183
agmT	8.12172
agmT	4.5938
agmT	6.03563
agmT	5.29185
agmT	8.06147
agmT	6.9063
agmT	6.94285
agmT	5.10798
agmT	5.04722
agmT	7.20268
agmT	8.07989
agmT	7.70608
agmT	5.4289
agmT	5.99074
agmT	6.14683
agmT	5.69317
agmT	4.73879
agmT	5.52852
agmT	7.84259
agmT	7.95704
agmT	6.60474
agmT	3.50604
agmT	6.94016
agmT	7.50396
agmT	6.79004
agmT	4.89136
agmT	5.57
agmT	6.85915
agmT	6.39921
agmT	6.32741
agmT	7.84517
agmT	5.33267
agmT	5.61473
agmT	7.30902
agmT	6.95725
agmT	5.84843
agmT	7.2894
agmT	4.82234
agmT	3.59
agmT	7.43323
agmT	5.99978
agmT	5.81377
agmT	7.91026
agmT	6.18949
agmT	3.92661
agmT	8.708
agmT	6.89691
agmT	6.2166
agmT	6.22
agmT	5.80271
agmT	6.718
agmT	6.88265
agmT	5.99456
agmT	4.6388
agmT	4.81079
agmT	5.99707
agmT	7.42576
agmT	4.81978
agmT	5.5204
agmT	7.85772
agmT	6.18215
agmT	5.98227
agmT	5.31838
agmT	7.2691
agmT	4.91652
agmT	4.80255
agmT	4.99982
agmT	6.46757
agmT	6.12692
agmT	6.67901
agmT	5.88485
agmT	3.51676
agmT	5.58622
agmT	5.9172
agmT	5.41303
agmT	5.28779
agmT	5.93398
agmT	4.64965
agmT	3.3006
agmT	5.15226
agmT	8.22232
agmT	5.01488
agmT	5.76675
agmT	5.01665
agmT	5.87543
agmT	8.03252
agmT	4.99631
agmT	3.92
agmT	6.10916
agmT	5.55691
agmT	5.76119
agmT	7.73829
agmT	5.06488
agmT	6.63233
agmT	5.59679
agmT	4.7835
agmT	4.27832
agmT	5.99833
agmT	6.29653
agmT	4.18447
agmT	6.84835
agmT	3.67223
agmT	8.6938
agmT	7.4045
agmT	7.0117
agmT	6.55843
agmT	5.92228
agmT	5.86122
agmT	5.42331
agmT	7.4594
agmT	5.81884
agmT	4.9532
agmT	6.89305
agmT	7.87173
agmT	3.51
agmT	3.85411
agmT	6.41365
agmT	7.51008
agmT	5.45532
agmT	6.66258
agmT	7.69596
agmT	8.60221
agmT	3.85
agmT	7.62114
agmT	3.87993
agmT	5.87522
agmT	3.3744
agmT	6.20746
agmT	7.15285
agmT	6.75074
agmT	3.39163
agmT	6.13322
agmT	7.73847
agmT	5.10721
agmT	5.58448
agmT	4.49982
agmT	3.61
agmT	3.68
agmT	6.00435
agmT	7.74148
agmT	3.66361
agmT	5.24973
agmT	5.77554
agmT	6.35219
agmT	8.15894
agmT	7.88489
agmT	8.07731
agmT	5.02001
agmT	5.14024
agmT	3.04315
agmT	5.46332
agmT	7.44484
agmT	4.26641
agmT	5.33373
agmT	3.46
agmT	4.79845
agmT	7.82064
agmT	5.84698
agmT	6.89287
agmT	2.64594
agmT	8.54246
agmT	7.07108
agmT	5.82321
agmT	6.63261
agmT	7.72744
agmT	4.85346
agmT	5.16764
agmT	7.47931
agmT	4.14503
agmT	6.53966
agmT	7.8251
agmT	5.7936
agmT	2.61196
agmT	5.20006
agmT	3.64329
agmT	6.46654
agmT	7.83711
agmT	6.19294
agmT	7.91468
agmT	7.88133
agmT	2.54791
agmT	5.97015
agmT	5.52642
agmT	5.78868
agmT	7.61145
agmT	7.17139
agmT	2.47372
agmT	5.78649
agmT	8.42548
agmT	5.1688
agmT	2.33867
agmT	6.70995
agmT	7.30408
agmT	7.17952
agmT	6.89248
agmT	5.41238
agmT	8.17237
agmT	6.87
agmT	7.26199
agmT	5.71452		6.0177	1.42602
agmTEAEA	6.70212
agmTEAEA	6.65611
agmTEAEA	5.42085
agmTEAEA	6.08465
agmTEAEA	7.02365
agmTEAEA	5.25702
agmTEAEA	8.15561
agmTEAEA	6.65855
agmTEAEA	2.40672
agmTEAEA	6.66538
agmTEAEA	5.3316
agmTEAEA	6.1053
agmTEAEA	6.99795
agmTEAEA	5.40531
agmTEAEA	8.04938
agmTEAEA	2.61641
agmTEAEA	7.49671
agmTEAEA	5.78464
agmTEAEA	6.34579
agmTEAEA	6.39929
agmTEAEA	8.28164
agmTEAEA	2.52898
agmTEAEA	2.44829
agmTEAEA	7.14327
agmTEAEA	5.11974
agmTEAEA	6.39046
agmTEAEA	2.40747
agmTEAEA	2.62624
agmTEAEA	5.51527
agmTEAEA	6.65136
agmTEAEA	6.32103
agmTEAEA	7.31534
agmTEAEA	5.99802
agmTEAEA	6.48385
agmTEAEA	6.94876
agmTEAEA	5.64217
agmTEAEA	5.92712
agmTEAEA	5.81599
agmTEAEA	7.39464
agmTEAEA	6.15322
agmTEAEA	5.3282
agmTEAEA	6.76022
agmTEAEA	6.82897
agmTEAEA	6.57366
agmTEAEA	3.35988
agmTEAEA	7.07844
agmTEAEA	7.63385
agmTEAEA	2.55437
agmTEAEA	6.04684
agmTEAEA	5.7452
agmTEAEA	5.6444
agmTEAEA	8.12891
agmTEAEA	5.71602
agmTEAEA	7.75052
agmTEAEA	8.79909
agmTEAEA	7.26088
agmTEAEA	3.13778
agmTEAEA	5.94822
agmTEAEA	7.40999
agmTEAEA	8.17323
agmTEAEA	6.15661
agmTEAEA	5.81762
agmTEAEA	7.11264
agmTEAEA	6.09691
agmTEAEA	5.15025
agmTEAEA	6.6362
agmTEAEA	4.92887
agmTEAEA	4.78235
agmTEAEA	5.05839
agmTEAEA	2.70753
agmTEAEA	5.44353
agmTEAEA	6.89653
agmTEAEA	5.53583
agmTEAEA	8.13939
agmTEAEA	8.98397
agmTEAEA	8.11452
agmTEAEA	6.03
agmTEAEA	5.2244
agmTEAEA	4.99937
agmTEAEA	4.91551
agmTEAEA	6.63132
agmTEAEA	7.6816
agmTEAEA	5.96797
agmTEAEA	3.24
agmTEAEA	3.10466
agmTEAEA	4.6215
agmTEAEA	5.93313
agmTEAEA	6.81726
agmTEAEA	8.11136
agmTEAEA	7.57573
agmTEAEA	6.09189
agmTEAEA	7.45582
agmTEAEA	5.56278
agmTEAEA	7.33882
agmTEAEA	7.22119
agmTEAEA	8.56754
agmTEAEA	6.04698
agmTEAEA	2.79396
agmTEAEA	5.77623
agmTEAEA	7.47079
agmTEAEA	7.34542
agmTEAEA	7.62303
agmTEAEA	7.95917
agmTEAEA	6.04717
agmTEAEA	6.00104
agmTEAEA	8.71511
agmTEAEA	6.30939
agmTEAEA	5.93923
agmTEAEA	5.69582
agmTEAEA	6.4451
agmTEAEA	7.57984
agmTEAEA	5.76329
agmTEAEA	6.25757
agmTEAEA	6.85022
agmTEAEA	6.03611
agmTEAEA	7.70544
agmTEAEA	4.6293
agmTEAEA	7.10923
agmTEAEA	6.51449
agmTEAEA	5.40899
agmTEAEA	5.8936
agmTEAEA	6.55
agmTEAEA	5.36211
agmTEAEA	5.99527
agmTEAEA	5.61556
agmTEAEA	5.5782
agmTEAEA	5.87141
agmTEAEA	7.62733
agmTEAEA	6.11984
agmTEAEA	8.00374
agmTEAEA	5.50898
agmTEAEA	7.30218
agmTEAEA	7.82406
agmTEAEA	8.37886
agmTEAEA	7.38058
agmTEAEA	6.54694
agmTEAEA	6.60703
agmTEAEA	5.15222
agmTEAEA	5.39
agmTEAEA	5.35183
agmTEAEA	6.58451
agmTEAEA	8.77537
agmTEAEA	7.01832
agmTEAEA	6.66222
agmTEAEA	3.08287
agmTEAEA	4.40575
agmTEAEA	2.63973
agmTEAEA	5.59993
agmTEAEA	6.85392
agmTEAEA	6.18
agmTEAEA	6.42727
agmTEAEA	5.30716
agmTEAEA	5.93774
agmTEAEA	5.86988
agmTEAEA	7.38
agmTEAEA	6.33571
agmTEAEA	7.65881
agmTEAEA	5.37973
agmTEAEA	7.74125
agmTEAEA	6.17062
agmTEAEA	4.40753
agmTEAEA	5.06089
agmTEAEA	8.01371
agmTEAEA	2.77446
agmTEAEA	6.76551
agmTEAEA	2.48612
agmTEAEA	6.38832
agmTEAEA	8.17651
agmTEAEA	7.50777
agmTEAEA	5.72393
agmTEAEA	5.60362
agmTEAEA	5.92
agmTEAEA	6.74916
agmTEAEA	6.91934
agmTEAEA	6.84954
agmTEAEA	5.48555
agmTEAEA	3.21022
agmTEAEA	7.08972
agmTEAEA	7.14549
agmTEAEA	7.09426
agmTEAEA	6.85177		6.14102	1.47637
D3	7.22852
D3	5.37824
D3	8.98392
D3	6.66497
D3	6.83191
D3	6.62931
D3	6.83629
D3	6.5914
D3	6.07727
D3	7.14932
D3	6.83916
D3	6.05316
D3	6.18361
D3	7.06541
D3	7.53978
D3	6.09403
D3	7.63916
D3	6.0252
D3	7.05016
D3	6.62032
D3	6.77944
D3	7.8936
D3	6.72892
D3	6.06592
D3	8.32652
D3	6.33391
D3	5.66185
D3	6.17929
D3	7.36521
D3	5.58775
D3	6.05148
D3	7.29386
D3	5.78733
D3	7.65422
D3	7.30987
D3	6.1249
D3	6.65894
D3	8.49625
D3	6.85613
D3	6.00017
D3	7.33429
D3	6.58459
D3	6.58664
D3	6.01127
D3	6.91565
D3	7.4085
D3	6.79756
D3	6.44694
D3	6.18657
D3	6.37614
D3	7.88811
D3	3.2752
D3	7.71047
D3	7.10268
D3	7.40713
D3	6.4776
D3	8.2427
D3	6.70146
D3	7.64853
D3	5.99877
D3	6.738
D3	6.19064
D3	7.47132
D3	6.92642
D3	8.27804
D3	5.98114
D3	6.11311
D3	6.45277
D3	6.31122
D3	4.43759
D3	7.33564
D3	6.16429
D3	5.76989
D3	6.21575
D3	4.83294
D3	7.90154
D3	6.48698
D3	6.44801
D3	5.29557
D3	6.05235
D3	6.95065
D3	7.60231
D3	8.2549
D3	8.95753
D3	5.92916
D3	6.83002
D3	7.8006
D3	7.64687
D3	7.33954
D3	7.11746
D3	6.32876
D3	7.51279
D3	6.03877
D3	7.20977
D3	5.67188
D3	7.66027
D3	7.08543
D3	7.65023
D3	5.5099
D3	5.78565
D3	8.41273
D3	7.36103
D3	7.56031
D3	6.08304
D3	6.69155
D3	7.51929
D3	6.56212
D3	7.17182
D3	7.17518
D3	6.01648
D3	7.69712
D3	6.12231
D3	7.28572
D3	5.5216
D3	5.72168
D3	6.64905
D3	4.77311
D3	5.79911
D3	8.2957
D3	4.02932
D3	6.03553
D3	6.29207
D3	6.98656
D3	5.4987
D3	6.18171
D3	3.0599
D3	7.35754
D3	7.22015
D3	5.62197
D3	7.28492
D3	4.19442
D3	6.58298
D3	3.96756
D3	6.05496
D3	5.54854
D3	5.35336
D3	7.53927
D3	7.17926
D3	7.12435
D3	7.0182
D3	5.72699
D3	5.3833
D3	5.66695
D3	7.37279
D3	5.31056
D3	7.61134
D3	3.52494
D3	5.46339
D3	5.7577
D3	6.8828
D3	7.26738
D3	7.90713
D3	5.46754
D3	8.01906
D3	7.75697
D3	7.92736
D3	7.14151
D3	6.30021
D3	5.89943
D3	7.66664
D3	5.04228
D3	4.52746
D3	7.75498
D3	6.16128
D3	8.78034
D3	7.70376
D3	7.21555
D3	6.42011
D3	7.69748
D3	6.58158
D3	6.06502
D3	6.13209
D3	7.60657
D3	8.44352
D3	7.17889
D3	5.99517
D3	6.77013
D3	7.09782
D3	6.63561
D3	7.62318
D3	6.8784
D3	5.78224
D3	6.67585
D3	3.41923
D3	7.1364
D3	6.4735
D3	5.60609
D3	5.52851
D3	5.36875
D3	6.43855
D3	4.61116
D3	6.55148
D3	6.0317
D3	6.05097
D3	7.6976
D3	5.98794
D3	7.44651
D3	5.38752
D3	6.53678
D3	7.85074
D3	6.11855
D3	7.05054
D3	6.87058
D3	7.53596
D3	5.94837
D3	6.56757
D3	6.68765
D3	7.52112
D3	7.14453
D3	6.9414
D3	5.99486
D3	6.97701
D3	7.94213
D3	4.97075
D3	6.94561
D3	7.07133
D3	6.22568
D3	6.72862
D3	3.64374
D3	5.86967
D3	6.14663
D3	6.91905
D3	6.47237
D3	7.99628
D3	7.88206
D3	7.64026
D3	6.07137
D3	6.77742
D3	3.40858
D3	6.91349
D3	6.82046
D3	7.90672
D3	6.42105
D3	5.51334
D3	5.94888
D3	7.91971
D3	5.75128
D3	6.77681
D3	7.77781
D3	7.43489
D3	5.32985
D3	4.68106
D3	5.97808
D3	5.97447
D3	7.6783
D3	7.3519
D3	7.75287
D3	7.1935
D3	6.35956
D3	6.42038
D3	8.32294
D3	7.94134
D3	6.44095
D3	7.41926
D3	7.86187
D3	7.47223
D3	5.80292
D3	3.45164
D3	5.91092
D3	6.74154
D3	7.77187
D3	6.55773
D3	5.95254
D3	6.73752
D3	6.24486
D3	6.35587
D3	6.64385
D3	5.52475
D3	6.08377
D3	7.36409
D3	7.70196
D3	7.43668
D3	7.67746
D3	6.22347
D3	6.36653
D3	6.36793
D3	6.32936
D3	7.61247
D3	6.25769
D3	3.83154
D3	4.56863
D3	5.91791
D3	7.97259
D3	6.08427
D3	5.66585
D3	7.11932
D3	7.46536
D3	6.72477
D3	7.14561
D3	5.7906
D3	7.28427
D3	7.213
D3	8.16239
D3	5.85971
D3	7.37683
D3	7.35045
D3	7.87811
D3	4.54702
D3	5.93902
D3	6.44721
D3	7.32349
D3	6.2873
D3	7.50846
D3	6.73294
D3	6.67899
D3	6.35375
D3	8.36202
D3	6.1625
D3	5.48259
D3	7.50554
D3	6.59246
D3	6.16361
D3	6.72988
D3	5.70664
D3	6.34771
D3	7.4496
D3	5.60982
D3	6.23605
D3	5.20625
D3	6.52759
D3	6.07384
D3	6.76113
D3	5.15164
D3	6.21853
D3	6.14859
D3	6.96137
D3	6.25802
D3	6.41639
D3	8.00334
D3	4.03158
D3	5.83461
D3	6.05469
D3	5.70499
D3	8.38002
D3	6.46804
D3	6.34004
D3	7.77576
D3	5.82718
D3	6.811
D3	6.70828
D3	7.12165
D3	6.30925
D3	6.92624
D3	8.05886
D3	6.14136
D3	6.00871
D3	7.74239
D3	5.28248
D3	7.08263
D3	6.59128		6.59022	1.0207
agmT MltG	5.09898
agmT MltG	6.98541
agmT MltG	5.83599
agmT MltG	7.35721
agmT MltG	8.67463
agmT MltG	9.13594
agmT MltG	4.36005
agmT MltG	6.89081
agmT MltG	6.23035
agmT MltG	6.1421
agmT MltG	9.59691
agmT MltG	7.08631
agmT MltG	7.79341
agmT MltG	4.74033
agmT MltG	9.70952
agmT MltG	5.85497
agmT MltG	5.56576
agmT MltG	5.29196
agmT MltG	8.04507
agmT MltG	7.52922
agmT MltG	8.65036
agmT MltG	5.52364
agmT MltG	6.45876
agmT MltG	5.61935
agmT MltG	4.67565
agmT MltG	6.03615
agmT MltG	6.25786
agmT MltG	3.8979
agmT MltG	7.34051
agmT MltG	6.94667
agmT MltG	8.60878
agmT MltG	6.9582
agmT MltG	6.86518
agmT MltG	7.87199
agmT MltG	7.46224
agmT MltG	5.62289
agmT MltG	4.71637
agmT MltG	7.4606
agmT MltG	9.83587
agmT MltG	5.60072
agmT MltG	7.61527
agmT MltG	5.54749
agmT MltG	6.52236
agmT MltG	5.93574
agmT MltG	8.09977
agmT MltG	5.07283
agmT MltG	5.80991
agmT MltG	5.48033
agmT MltG	7.81811
agmT MltG	5.23027
agmT MltG	6.84142
agmT MltG	5.56793
agmT MltG	9.43278
agmT MltG	6.69366
agmT MltG	8.06167
agmT MltG	4.75383
agmT MltG	7.73113
agmT MltG	4.78204
agmT MltG	10.5304
agmT MltG	6.42741
agmT MltG	9.69282
agmT MltG	5.32164
agmT MltG	8.94936
agmT MltG	6.79396
agmT MltG	8.4831
agmT MltG	6.52022
agmT MltG	5.21054
agmT MltG	6.31101
agmT MltG	5.12572
agmT MltG	9.97035
agmT MltG	6.61408
agmT MltG	5.48669
agmT MltG	6.87021
agmT MltG	6.16974
agmT MltG	6.52349
agmT MltG	5.87719
agmT MltG	5.19395
agmT MltG	6.94961
agmT MltG	7.66896
agmT MltG	7.93996
agmT MltG	5.23167
agmT MltG	8.13921
agmT MltG	9.54416
agmT MltG	5.5704
agmT MltG	8.67773
agmT MltG	6.94608
agmT MltG	6.35716
agmT MltG	6.31238
agmT MltG	6.12608
agmT MltG	6.36727
agmT MltG	5.99609
agmT MltG	7.68317
agmT MltG	7.52858
agmT MltG	5.78077
agmT MltG	5.88802
agmT MltG	6.84944
agmT MltG	10.9217
agmT MltG	8.01299
agmT MltG	7.19601
agmT MltG	5.1865
agmT MltG	6.53722
agmT MltG	5.14757
agmT MltG	10.295
agmT MltG	6.879
agmT MltG	6.89072
agmT MltG	4.90973
agmT MltG	5.51829
agmT MltG	5.44969
agmT MltG	5.98883
agmT MltG	6.09444
agmT MltG	6.43721
agmT MltG	8.12148
agmT MltG	7.67846
agmT MltG	6.46691
agmT MltG	7.40809
agmT MltG	6.59415
agmT MltG	6.48722
agmT MltG	5.05781
agmT MltG	5.72208
agmT MltG	6.38098
agmT MltG	7.51623
agmT MltG	8.5676
agmT MltG	8.4551
agmT MltG	6.19721
agmT MltG	7.69057
agmT MltG	5.24766
agmT MltG	6.60396
agmT MltG	8.40785
agmT MltG	6.80796
agmT MltG	8.26984
agmT MltG	8.16951
agmT MltG	9.00176
agmT MltG	7.7195
agmT MltG	8.3396
agmT MltG	5.18013
agmT MltG	8.40208
agmT MltG	9.88718
agmT MltG	4.85842
agmT MltG	6.8519
agmT MltG	4.63714
agmT MltG	7.48598
agmT MltG	7.83953
agmT MltG	4.72474
agmT MltG	4.12096
agmT MltG	6.03553
agmT MltG	7.65039
agmT MltG	8.9657
agmT MltG	7.02611
agmT MltG	8.70423
agmT MltG	6.10031
agmT MltG	5.80014
agmT MltG	7.66433
agmT MltG	6.64465
agmT MltG	5.64718
agmT MltG	7.13953
agmT MltG	6.65799
agmT MltG	6.01946
agmT MltG	5.23667
agmT MltG	4.31671
agmT MltG	6.79356
agmT MltG	7.01819
agmT MltG	8.40484
agmT MltG	9.57399
agmT MltG	5.43953
agmT MltG	6.69849
agmT MltG	5.39441
agmT MltG	7.10587
agmT MltG	5.9417
agmT MltG	8.51293
agmT MltG	6.31623
agmT MltG	7.00679
agmT MltG	5.83475
agmT MltG	8.5505
agmT MltG	7.77196
agmT MltG	6.90871
agmT MltG	8.98834
agmT MltG	6.22421
agmT MltG	4.09478
agmT MltG	9.63769
agmT MltG	5.9193
agmT MltG	8.73718
agmT MltG	5.75032
agmT MltG	7.62712
agmT MltG	7.53498
agmT MltG	4.55957
agmT MltG	8.95643
agmT MltG	5.7016
agmT MltG	9.44092
agmT MltG	5.10807
agmT MltG	6.5156
agmT MltG	6.53052
agmT MltG	8.67746
agmT MltG	6.48082
agmT MltG	7.33833
agmT MltG	6.62939
agmT MltG	5.55995
agmT MltG	9.81527
agmT MltG	8.48435
agmT MltG	5.57536
agmT MltG	6.21998
agmT MltG	9.6635
agmT MltG	4.21525
agmT MltG	8.43887
agmT MltG	5.82122
agmT MltG	5.93401
agmT MltG	8.97771
agmT MltG	8.5941
agmT MltG	5.32126
agmT MltG	7.01595
agmT MltG	9.79139
agmT MltG	6.42979
agmT MltG	5.88727
agmT MltG	4.65431
agmT MltG	4.48869
agmT MltG	5.548
agmT MltG	6.77515
agmT MltG	7.49402
agmT MltG	8.37712
agmT MltG	5.09266
agmT MltG	6.16347
agmT MltG	6.4043
agmT MltG	9.91997
agmT MltG	5.0245
agmT MltG	5.04499
agmT MltG	6.05276
agmT MltG	8.924
agmT MltG	8.25754
agmT MltG	5.68671
agmT MltG	5.10664
agmT MltG	6.40297
agmT MltG	6.70157
agmT MltG	9.74858
agmT MltG	7.04939
agmT MltG	5.17817
agmT MltG	9.32316
agmT MltG	7.54041
agmT MltG	6.44912
agmT MltG	8.83014
agmT MltG	7.39128
agmT MltG	5.61512
agmT MltG	7.9651
agmT MltG	6.26554
agmT MltG	7.57312
agmT MltG	7.40439
agmT MltG	5.96799
agmT MltG	6.09226
agmT MltG	6.78161
agmT MltG	5.04245
agmT MltG	5.6887
agmT MltG	9.40354
agmT MltG	6.37078
agmT MltG	6.14822
agmT MltG	7.44287
agmT MltG	5.91187
agmT MltG	10.2393
agmT MltG	7.62608
agmT MltG	5.74716
agmT MltG	8.12273
agmT MltG	7.81179
agmT MltG	6.83503
agmT MltG	6.9963
agmT MltG	9.34631
agmT MltG	5.42254
agmT MltG	7.68148
agmT MltG	6.73581
agmT MltG	9.38207
agmT MltG	6.41994
agmT MltG	8.9904
agmT MltG	6.41345
agmT MltG	5.49723
agmT MltG	9.93438
agmT MltG	8.10729
agmT MltG	5.75979
agmT MltG	7.57563
agmT MltG	5.55202
agmT MltG	5.79443
agmT MltG	6.13295
agmT MltG	6.01035
agmT MltG	9.12627
agmT MltG	7.7671
agmT MltG	9.93049
agmT MltG	8.81058
agmT MltG	3.85904
agmT MltG	7.27435
agmT MltG	7.88612
agmT MltG	9.52636
agmT MltG	5.55966
agmT MltG	5.73066
agmT MltG	7.52443
agmT MltG	6.5246
agmT MltG	5.10392
agmT MltG	5.77712
agmT MltG	4.85302
agmT MltG	7.39836
agmT MltG	7.95432
agmT MltG	6.22204
agmT MltG	10.4029
agmT MltG	8.43843
agmT MltG	7.32109
agmT MltG	6.81882
agmT MltG	6.35819
agmT MltG	7.93312
agmT MltG	6.17236
agmT MltG	7.83144
agmT MltG	6.18411
agmT MltG	7.0415
agmT MltG	6.54761
agmT MltG	5.37871
agmT MltG	5.50392
agmT MltG	7.69705
agmT MltG	6.30617
agmT MltG	7.38938
agmT MltG	7.35796
agmT MltG	8.23412
agmT MltG	6.38816
agmT MltG	8.78523
agmT MltG	5.29362
agmT MltG	6.1919
agmT MltG	8.60193
agmT MltG	6.06319
agmT MltG	7.15531
agmT MltG	9.24197
agmT MltG	5.84321
agmT MltG	6.01611
agmT MltG	6.53826
agmT MltG	9.37862
agmT MltG	6.99801
agmT MltG	8.13392
agmT MltG	6.65148
agmT MltG	6.45434
agmT MltG	7.50007
agmT MltG	8.20938
agmT MltG	7.34996
agmT MltG	6.51469
agmT MltG	8.49135
agmT MltG	7.86008
agmT MltG	5.49205
agmT MltG	9.14708
agmT MltG	8.32499
agmT MltG	7.99983
agmT MltG	6.00425
agmT MltG	4.96534
agmT MltG	8.25165
agmT MltG	6.53856
agmT MltG	8.09052
agmT MltG	6.00376
agmT MltG	5.81324
agmT MltG	6.83561
agmT MltG	7.01806
agmT MltG	7.04054
agmT MltG	6.11404
agmT MltG	10.4007
agmT MltG	4.21532
agmT MltG	5.83628
agmT MltG	6.46184
agmT MltG	5.85317
agmT MltG	5.75868
agmT MltG	5.3473
agmT MltG	5.39622
agmT MltG	6.35422
agmT MltG	6.18566
agmT MltG	5.15908
agmT MltG	4.94017
agmT MltG	8.1768
agmT MltG	8.19319
agmT MltG	7.94151
agmT MltG	6.81405
agmT MltG	5.18723
agmT MltG	5.31913
agmT MltG	6.51105
agmT MltG	8.57154
agmT MltG	6.44925
agmT MltG	9.12828
agmT MltG	5.79388
agmT MltG	6.14761
agmT MltG	5.92186
agmT MltG	7.23004
agmT MltG	7.2939
agmT MltG	6.47043
agmT MltG	5.60932
agmT MltG	6.62586
agmT MltG	6.36488
agmT MltG	6.52012
agmT MltG	6.94286
agmT MltG	5.75356
agmT MltG	8.5709
agmT MltG	9.91061
agmT MltG	6.91053
agmT MltG	5.08272
agmT MltG	9.29313
agmT MltG	6.79887
agmT MltG	7.49737
agmT MltG	5.7088
agmT MltG	5.69851
agmT MltG	7.26013
agmT MltG	9.51057
agmT MltG	6.12182
agmT MltG	5.88555
agmT MltG	6.23079
agmT MltG	5.05841
agmT MltG	5.64662
agmT MltG	6.08553
agmT MltG	6.02392
agmT MltG	6.89055
agmT MltG	8.88358
agmT MltG	7.98936
agmT MltG	6.12218
agmT MltG	6.56771
agmT MltG	7.19268
agmT MltG	7.31029
agmT MltG	5.32714
agmT MltG	4.91873
agmT MltG	7.07211
agmT MltG	5.48074
agmT MltG	7.76167
agmT MltG	8.423
agmT MltG	6.28883
agmT MltG	6.39294
agmT MltG	7.04857
agmT MltG	5.06565
agmT MltG	9.19547
agmT MltG	5.77534
agmT MltG	4.00162
agmT MltG	6.38529
agmT MltG	6.9587
agmT MltG	5.68502
agmT MltG	5.89587
agmT MltG	6.48731
agmT MltG	6.61812
agmT MltG	9.04942
agmT MltG	5.30535
agmT MltG	5.75278
agmT MltG	5.62557
agmT MltG	5.84049
agmT MltG	6.80789
agmT MltG	5.74208
agmT MltG	5.89246
agmT MltG	4.73558
agmT MltG	6.09918
agmT MltG	8.94992
agmT MltG	5.40983
agmT MltG	6.56386
agmT MltG	8.86989
agmT MltG	7.93086
agmT MltG	6.65428
agmT MltG	5.97653
agmT MltG	6.68708
agmT MltG	6.16041
agmT MltG	6.23062
agmT MltG	5.84692
agmT MltG	9.60697
agmT MltG	8.18262
agmT MltG	6.03576
agmT MltG	7.53332
agmT MltG	8.00435
agmT MltG	5.36341
agmT MltG	6.38608
agmT MltG	8.00465
agmT MltG	7.06818
agmT MltG	5.32702
agmT MltG	7.9793
agmT MltG	6.89377
agmT MltG	5.81575
agmT MltG	6.21616
agmT MltG	5.40097
agmT MltG	8.62363
agmT MltG	6.05665
agmT MltG	9.9219
agmT MltG	4.98375
agmT MltG	5.11891
agmT MltG	8.55675
agmT MltG	8.8978
agmT MltG	9.3285
agmT MltG	5.78482
agmT MltG	7.12481
agmT MltG	5.02155
agmT MltG	7.8207
agmT MltG	5.14117
agmT MltG	6.12452
agmT MltG	7.2686
agmT MltG	7.93644
agmT MltG	6.79639
agmT MltG	6.30978
agmT MltG	6.80905
agmT MltG	5.79134
agmT MltG	6.00847
agmT MltG	7.54876
agmT MltG	6.9741
agmT MltG	5.66681
agmT MltG	7.11626
agmT MltG	6.36061
agmT MltG	8.04618
agmT MltG	5.79105
agmT MltG	5.82975
agmT MltG	7.15031
agmT MltG	9.51692
agmT MltG	6.36979
agmT MltG	4.48918
agmT MltG	7.16228
agmT MltG	5.46247
agmT MltG	7.32904
agmT MltG	6.43295
agmT MltG	8.06649
agmT MltG	6.91671
agmT MltG	8.23887
agmT MltG	7.49359
agmT MltG	7.24936
agmT MltG	5.66507
agmT MltG	8.99978
agmT MltG	6.6689
agmT MltG	7.81494
agmT MltG	6.19836
agmT MltG	6.94029
agmT MltG	5.08882
agmT MltG	8.12855
agmT MltG	6.68191
agmT MltG	7.64042
agmT MltG	5.26347
agmT MltG	7.75515
agmT MltG	5.14763
agmT MltG	9.79004
agmT MltG	7.86115
agmT MltG	6.15704
agmT MltG	5.46794
agmT MltG	5.56212
agmT MltG	4.54847
agmT MltG	9.53297
agmT MltG	9.60502
agmT MltG	4.77978
agmT MltG	5.23414
agmT MltG	4.76682
agmT MltG	7.2171
agmT MltG	9.67143
agmT MltG	5.52911
agmT MltG	6.29908
agmT MltG	8.14057
agmT MltG	8.53937
agmT MltG	10.5081
agmT MltG	6.98597
agmT MltG	10.6285
agmT MltG	5.41876
agmT MltG	5.4938
agmT MltG	6.46304
agmT MltG	9.09176
agmT MltG	5.57199
agmT MltG	6.39665
agmT MltG	7.3809
agmT MltG	6.26345
agmT MltG	6.11452
agmT MltG	5.27814
agmT MltG	5.47307
agmT MltG	4.82895
agmT MltG	6.86456
agmT MltG	6.74799
agmT MltG	7.79105
agmT MltG	8.69387
agmT MltG	5.52204
agmT MltG	7.58315
agmT MltG	5.00468
agmT MltG	8.28961
agmT MltG	5.47626
agmT MltG	5.36807
agmT MltG	8.09975
agmT MltG	6.14337
agmT MltG	7.75669		6.86605	1.42563
agmTEAEA MltG	9.82066
agmTEAEA MltG	6.80464
agmTEAEA MltG	6.57492
agmTEAEA MltG	5.82766
agmTEAEA MltG	5.06402
agmTEAEA MltG	5.1119
agmTEAEA MltG	8.90973
agmTEAEA MltG	4.6201
agmTEAEA MltG	5.30164
agmTEAEA MltG	9.48521
agmTEAEA MltG	6.34693
agmTEAEA MltG	5.3844
agmTEAEA MltG	7.11018
agmTEAEA MltG	5.36362
agmTEAEA MltG	6.20432
agmTEAEA MltG	5.77559
agmTEAEA MltG	5.86965
agmTEAEA MltG	6.55317
agmTEAEA MltG	7.66491
agmTEAEA MltG	6.16745
agmTEAEA MltG	6.36098
agmTEAEA MltG	8.10669
agmTEAEA MltG	5.36655
agmTEAEA MltG	8.86158
agmTEAEA MltG	6.96426
agmTEAEA MltG	5.75923
agmTEAEA MltG	9.93682
agmTEAEA MltG	5.45892
agmTEAEA MltG	5.61098
agmTEAEA MltG	7.2529
agmTEAEA MltG	4.711
agmTEAEA MltG	5.50292
agmTEAEA MltG	5.84626
agmTEAEA MltG	3.95509
agmTEAEA MltG	5.91886
agmTEAEA MltG	5.55899
agmTEAEA MltG	5.58929
agmTEAEA MltG	8.23971
agmTEAEA MltG	5.35302
agmTEAEA MltG	5.07674
[truncated: 516 more rows]

## Sheet: W
DZ2	1.2878
DZ2	1.39181
DZ2	1.20923
DZ2	1.17118
DZ2	1.13482
DZ2	1.5137
DZ2	1.19085
DZ2	1.32537
DZ2	1.2942
DZ2	1.53135
DZ2	1.34288
DZ2	1.36197
DZ2	1.46407
DZ2	1.15169
DZ2	1.12695
DZ2	1.25875
DZ2	1.26547
DZ2	1.44935
DZ2	1.1946
DZ2	1.26327
DZ2	1.59959
DZ2	1.42029
DZ2	1.32617
DZ2	1.13489
DZ2	1.16106
DZ2	1.18939
DZ2	1.35114
DZ2	1.21969
DZ2	1.2278
DZ2	1.27452
DZ2	1.28996
DZ2	1.51535
DZ2	1.5473
DZ2	1.10191
DZ2	1.18594
DZ2	1.44144
DZ2	1.2118
DZ2	1.64435
DZ2	1.31652
DZ2	1.12969
DZ2	1.20362
DZ2	1.22787
DZ2	1.14037
DZ2	1.21999
DZ2	1.1714
DZ2	1.30917
DZ2	1.19202
DZ2	1.2266
DZ2	1.22934
DZ2	1.52719
DZ2	1.67696
DZ2	1.38028
DZ2	1.06027
DZ2	1.32905
DZ2	1.60344
DZ2	1.23118
DZ2	1.38525
DZ2	1.17428
DZ2	1.09058
DZ2	1.30507
DZ2	1.41716
DZ2	1.43192
DZ2	1.31352
DZ2	1.45693
DZ2	1.17375
DZ2	1.31664
DZ2	1.40423
DZ2	1.24467
DZ2	1.55526
DZ2	1.43924
DZ2	1.22681
DZ2	1.25382
DZ2	1.12315
DZ2	1.35834
DZ2	1.56114
DZ2	1.57102
DZ2	1.39001
DZ2	1.17263
DZ2	1.593
DZ2	1.23974
DZ2	1.26637
DZ2	1.26223
DZ2	1.59762
DZ2	1.2694
DZ2	1.34786
DZ2	1.17732
DZ2	1.61407
DZ2	1.2161
DZ2	1.28275
DZ2	1.28492
DZ2	1.25231
DZ2	1.18997
DZ2	1.48739
DZ2	1.16385
DZ2	1.21367
DZ2	1.11784
DZ2	1.42048
DZ2	1.17334
DZ2	1.21814
DZ2	1.12306
DZ2	1.16088
DZ2	1.21045
DZ2	1.1278
DZ2	1.31438
DZ2	1.04891
DZ2	1.21225
DZ2	1.18189
DZ2	1.17102
DZ2	1.3421
DZ2	1.10284
DZ2	1.16651
DZ2	1.15273
DZ2	1.22512
DZ2	1.20433
DZ2	1.19157
DZ2	1.2475
DZ2	1.28323
DZ2	1.65917
DZ2	1.20114
DZ2	1.09334
DZ2	1.09794
DZ2	1.28507
DZ2	1.27142
DZ2	1.53851
DZ2	1.15718
DZ2	1.21363
DZ2	1.4501
DZ2	1.28252
DZ2	1.25869
DZ2	1.15183
DZ2	1.14083
DZ2	1.26835
DZ2	1.38036
DZ2	1.62074
DZ2	1.18496
DZ2	1.16524
DZ2	1.28476
DZ2	1.21976
DZ2	1.17008
DZ2	1.14986
DZ2	1.43464
DZ2	1.03686
DZ2	1.1934
DZ2	1.26852
DZ2	1.18715
DZ2	1.21684
DZ2	1.20851
DZ2	1.33243
DZ2	1.19539
DZ2	1.79875
DZ2	1.18489
DZ2	1.33736
DZ2	1.53453
DZ2	1.20417
DZ2	1.67328
DZ2	1.4391
DZ2	1.41737
DZ2	1.2175
DZ2	1.28352
DZ2	1.81922
DZ2	1.58389
DZ2	1.13081
DZ2	1.29868
DZ2	1.27809
DZ2	1.47667
DZ2	1.24521
DZ2	1.71425
DZ2	1.5916
DZ2	1.30754
DZ2	1.47966
DZ2	1.24708
DZ2	1.26065
DZ2	1.10474
DZ2	1.73393
DZ2	1.21055
DZ2	1.36389
DZ2	1.50628
DZ2	1.26022
DZ2	1.30388
DZ2	1.33003
DZ2	1.2304
DZ2	1.20398
DZ2	1.2165
DZ2	1.41969
DZ2	1.25779
DZ2	1.43614
DZ2	1.40751
DZ2	1.28214
DZ2	1.35011
DZ2	1.26369
DZ2	1.2169
DZ2	1.50642
DZ2	1.21069
DZ2	1.21751
DZ2	1.35065
DZ2	1.26165
DZ2	1.12277
DZ2	1.61699
DZ2	1.14257
DZ2	1.27129
DZ2	1.20602
DZ2	1.10953
DZ2	1.41791
DZ2	1.20769
DZ2	1.23844
DZ2	1.25558
DZ2	1.15231
DZ2	1.71783
DZ2	1.09451
DZ2	1.00501
DZ2	1.37378
DZ2	1.21067
DZ2	1.31462
DZ2	1.2007
DZ2	1.24015
DZ2	1.21193
DZ2	1.18578
DZ2	1.27476
DZ2	1.13211
DZ2	1.17208
DZ2	1.39867
DZ2	1.24028
DZ2	1.15996
DZ2	1.53586
DZ2	1.13547
DZ2	1.13816
DZ2	1.38421
DZ2	1.27232
DZ2	1.2645
DZ2	1.19202
DZ2	1.03767
DZ2	1.97223
DZ2	1.69895
DZ2	1.13871
DZ2	1.16292
DZ2	1.18196
DZ2	1.12221
DZ2	1.17569
DZ2	1.18881
DZ2	1.14695
DZ2	1.3873
DZ2	1.41899
DZ2	1.35324
DZ2	1.12365
DZ2	1.24956
DZ2	1.49798
DZ2	1.3223
DZ2	1.13879
DZ2	1.4451
DZ2	1.35901
DZ2	1.17829
DZ2	1.46951
DZ2	1.14284
DZ2	1.27378
DZ2	1.59296
DZ2	1.19204
DZ2	1.16772
DZ2	1.2492
DZ2	1.26263
DZ2	1.19458
DZ2	1.2828
DZ2	1.29263
DZ2	1.44546
DZ2	1.12925
DZ2	1.29758
DZ2	1.24681
DZ2	1.29804
DZ2	1.19677
DZ2	1.12932
DZ2	1.18879
DZ2	1.45916
DZ2	1.19047
DZ2	1.19395
DZ2	1.23395
DZ2	1.31567
DZ2	1.63136
DZ2	1.68861
DZ2	1.20277
DZ2	1.38139
DZ2	1.19898
DZ2	1.32467
DZ2	1.14973
DZ2	1.4562
DZ2	1.19795
DZ2	1.10164
DZ2	1.1592
DZ2	1.2185
DZ2	1.33766
DZ2	1.15851
DZ2	1.19484
DZ2	1.05371
DZ2	1.05587
DZ2	1.54314
DZ2	1.28716
DZ2	1.25491
DZ2	1.1755
DZ2	1.28963
DZ2	1.25611
DZ2	1.11614
DZ2	1.0585
DZ2	1.45012
DZ2	1.23125
DZ2	1.20256
DZ2	1.18657
DZ2	1.49615
DZ2	1.20997
DZ2	1.41615
DZ2	1.30922
DZ2	1.23494
DZ2	1.24779
DZ2	1.26531
DZ2	1.13573
DZ2	1.18491
DZ2	1.4325
DZ2	1.27114
DZ2	1.61147
DZ2	1.22828
DZ2	1.3166
DZ2	1.23595
DZ2	1.1704
DZ2	1.11934
DZ2	1.21232
DZ2	1.10323
DZ2	1.06815
DZ2	1.17984
DZ2	1.39424
DZ2	1.01412
DZ2	1.16164
DZ2	1.49965
DZ2	1.15231
DZ2	1.21195
DZ2	1.19911
DZ2	1.23485
DZ2	1.12957
DZ2	1.20394
DZ2	1.20076
DZ2	1.08032
DZ2	1.28912
DZ2	1.15017
DZ2	1.17458
DZ2	1.1679
DZ2	1.22373
DZ2	1.44287
DZ2	1.34495
DZ2	1.26944
DZ2	1.14335
DZ2	1.42249
DZ2	1.24363
DZ2	1.19623
DZ2	1.31197
DZ2	1.13082
DZ2	1.02705
DZ2	1.18779
DZ2	1.41636
DZ2	1.74385
DZ2	1.16658
DZ2	1.26265
DZ2	1.18701
DZ2	1.52878
DZ2	1.16489
DZ2	1.10742
DZ2	1.12472
DZ2	1.4403
DZ2	1.47481
DZ2	1.34543
DZ2	1.15497
DZ2	1.12566
DZ2	1.59862
DZ2	1.53412
DZ2	1.32986
DZ2	1.13606
DZ2	1.19514
DZ2	1.21994
DZ2	1.15165
DZ2	1.34891
DZ2	1.21335
DZ2	1.18702
DZ2	1.29755
DZ2	1.21449
DZ2	1.42017
DZ2	1.4774
DZ2	1.19032
DZ2	1.20759
DZ2	1.31324
DZ2	1.45047
DZ2	1.11795
DZ2	1.6073
DZ2	1.83257
DZ2	1.29336
DZ2	1.25887
DZ2	1.35839
DZ2	1.27649
DZ2	1.415
DZ2	1.22951
DZ2	1.24697
DZ2	1.18333
DZ2	1.11598
DZ2	1.15816
DZ2	1.31867
DZ2	1.11925
DZ2	1.59342
DZ2	1.20221
DZ2	1.17235
DZ2	1.20129
DZ2	1.46265
DZ2	1.23849
DZ2	1.26725
DZ2	1.21964
DZ2	1.12982
DZ2	1.82732
DZ2	1.093
DZ2	1.54637
DZ2	1.24357
DZ2	1.20136
DZ2	1.44868
DZ2	1.25287
DZ2	1.43494
DZ2	1.51486
DZ2	1.23711
DZ2	1.34911
DZ2	1.16146
DZ2	1.13223
DZ2	1.2505
DZ2	1.14377
DZ2	1.11839
DZ2	1.11158
DZ2	1.17439
DZ2	1.15693
DZ2	1.24742
DZ2	1.02681
DZ2	1.26629
DZ2	1.22842
DZ2	1.05406
DZ2	1.41282
DZ2	1.21955
DZ2	1.18545
DZ2	1.2673
DZ2	1.39707
DZ2	1.60203
DZ2	1.23534
DZ2	1.27994
DZ2	1.25582
DZ2	1.56308
DZ2	1.48013
DZ2	1.38143
DZ2	1.25132
DZ2	1.13633
DZ2	1.37661
DZ2	1.13025
DZ2	1.48544
DZ2	1.32967
DZ2	1.49201
DZ2	1.43241
DZ2	1.17722
DZ2	1.26431
DZ2	1.62922
DZ2	1.10915
DZ2	1.12561
DZ2	1.67576
DZ2	1.22735
DZ2	1.5384
DZ2	1.25611
DZ2	1.19788
DZ2	1.57818
DZ2	1.14578
DZ2	1.20071
DZ2	1.18186
DZ2	1.202
DZ2	1.2122
DZ2	1.17432
DZ2	1.13401
DZ2	1.17198
DZ2	1.29769
DZ2	1.24577
DZ2	1.21667
DZ2	1.48604
DZ2	1.28353
DZ2	1.25398
DZ2	1.11682
DZ2	1.30499
DZ2	1.22096
DZ2	1.19686
DZ2	1.14412
DZ2	1.1316
DZ2	1.18004
DZ2	1.75739
DZ2	1.13813
DZ2	1.1828
DZ2	1.26179
DZ2	1.30913
DZ2	0.850217
DZ2	1.1616
DZ2	1.13992
DZ2	1.1566
DZ2	1.14716
DZ2	1.2368
DZ2	1.17496
DZ2	1.65837
DZ2	1.30161
DZ2	1.29607
DZ2	1.16742
DZ2	1.53428
DZ2	1.18717
DZ2	1.3637
DZ2	1.19057
DZ2	1.28688
DZ2	1.17468
DZ2	1.25707
DZ2	1.1212
DZ2	1.35385
DZ2	1.28261
DZ2	1.13511
DZ2	1.28607
DZ2	1.27322
DZ2	1.26945
DZ2	1.19156
DZ2	1.19681
DZ2	1.45866
DZ2	1.27455
DZ2	1.14236
DZ2	1.20541
DZ2	1.19704
DZ2	1.49661
DZ2	1.47228
DZ2	1.03781
DZ2	1.22912
DZ2	1.22958
DZ2	1.29523
DZ2	1.25793
DZ2	1.15871
DZ2	1.23813
DZ2	1.30343
DZ2	1.18257
DZ2	1.22257
DZ2	1.18343
DZ2	1.40309
DZ2	1.22084
DZ2	1.03639
DZ2	1.14153
DZ2	1.20157
DZ2	1.12182
DZ2	1.44039
DZ2	1.1149
DZ2	1.20185
DZ2	1.14366
DZ2	1.25999
DZ2	1.14769
DZ2	1.20426
DZ2	1.15786
DZ2	1.12042
DZ2	1.28107
DZ2	1.19669
DZ2	1.78883
DZ2	1.12618
DZ2	1.05496
DZ2	1.11291
DZ2	1.03517
DZ2	1.24772
DZ2	1.17442
DZ2	1.41547
DZ2	1.34926
DZ2	1.16771
DZ2	1.07191
DZ2	1.17154
DZ2	1.01339
DZ2	1.09652
DZ2	1.26617
DZ2	1.09441
DZ2	1.35693
DZ2	1.31719
DZ2	1.21491
DZ2	1.34317
DZ2	1.06982
DZ2	1.3293
DZ2	1.19468
DZ2	1.2275
DZ2	1.38999
DZ2	1.68964
DZ2	1.23938
DZ2	1.26345
DZ2	1.50727
DZ2	1.0193
DZ2	1.04196
DZ2	1.53049
DZ2	1.17268
DZ2	1.20684
DZ2	1.31831
DZ2	1.25002
DZ2	1.24087
DZ2	1.35481
DZ2	1.45306
DZ2	1.27764
DZ2	1.14296
DZ2	1.58267
DZ2	1.46317
DZ2	1.37748
DZ2	1.40963
DZ2	1.1371
DZ2	1.16157
DZ2	1.26683
DZ2	1.40397
DZ2	1.17747
DZ2	1.3405
DZ2	1.15917
DZ2	1.38244
DZ2	1.28707
DZ2	1.34722
DZ2	1.06266
DZ2	1.50292
DZ2	1.28719
DZ2	1.27108
DZ2	1.33913
DZ2	1.23552
DZ2	1.16907
DZ2	1.25781
DZ2	1.36697
DZ2	1.16
DZ2	1.23255
DZ2	1.36739
DZ2	1.30071
DZ2	1.31477
DZ2	1.61451
DZ2	1.01341
DZ2	1.15316
DZ2	1.23673
DZ2	1.19504
DZ2	1.65545
DZ2	1.53543
DZ2	1.47426
DZ2	1.27085
DZ2	1.21688
DZ2	1.19394
DZ2	1.18644
DZ2	1.5981
DZ2	1.25229
DZ2	1.59414
DZ2	1.28723
DZ2	1.18767
DZ2	1.31256
DZ2	1.39724
DZ2	1.13304
DZ2	1.21521		1.28012	0.157089	n=642
agmT	1.10826
agmT	1.2286
agmT	2.09444
agmT	1.13858
agmT	1.15007
agmT	1.12311
agmT	1.14312
agmT	1.16492
agmT	1.18614
agmT	1.3265
agmT	1.21136
agmT	1.23215
agmT	1.103
agmT	1.7868
agmT	1.14505
agmT	2.04226
agmT	1.40437
agmT	1.87
agmT	1.18433
agmT	1.21087
agmT	1.11125
agmT	1.46
agmT	1.4554
agmT	1.15304
agmT	1.11089
agmT	1.31391
agmT	1.2225
agmT	1.37299
agmT	2.01082
agmT	1.19849
agmT	1.15004
agmT	1.84878
agmT	1.1373
agmT	1.21477
agmT	1.15898
agmT	1.20978
agmT	1.23533
agmT	1.14729
agmT	1.18354
agmT	1.0973
agmT	1.26033
agmT	1.16521
agmT	1.20759
agmT	1.84
agmT	1.19797
agmT	1.20647
agmT	1.44246
agmT	1.14526
agmT	1.18184
agmT	1.16424
agmT	1.19297
agmT	1.27952
agmT	1.16402
agmT	1.12682
agmT	1.68678
agmT	1.36378
agmT	1.10922
agmT	1.22314
agmT	1.23789
agmT	1.17004
agmT	1.95201
agmT	2.08926
agmT	1.17918
agmT	1.14683
agmT	1.17076
agmT	2.01728
agmT	1.89295
agmT	1.14303
agmT	1.17311
agmT	1.29273
agmT	1.29137
agmT	1.69283
agmT	1.18204
agmT	1.13618
agmT	1.42239
agmT	1.33811
agmT	1.57097
agmT	1.18846
agmT	1.21366
agmT	1.17141
agmT	1.30248
agmT	1.97252
agmT	1.17258
agmT	1.15452
agmT	1.20364
agmT	1.21182
agmT	1.15333
agmT	1.10063
agmT	1.15368
agmT	1.17165
agmT	1.12894
agmT	2.09432
agmT	1.25176
agmT	1.99991
agmT	1.13156
agmT	1.31821
agmT	1.12232
agmT	1.10964
agmT	1.30197
agmT	1.09633
agmT	1.888
agmT	1.86606
agmT	1.41259
agmT	1.72228
agmT	1.47827
agmT	1.20182
agmT	1.65713
agmT	1.16594
agmT	1.19813
agmT	1.74647
agmT	1.10223
agmT	1.21469
agmT	1.13685
agmT	1.21141
agmT	1.88961
agmT	1.32214
agmT	1.3247
agmT	1.17243
agmT	1.14304
agmT	1.4221
agmT	1.19431
agmT	1.23545
agmT	1.7241
agmT	1.86
agmT	1.39955
agmT	1.32065
agmT	1.10875
agmT	1.15495
agmT	1.13013
agmT	1.19714
agmT	1.26146
agmT	1.25134
agmT	1.14937
agmT	1.98473
agmT	1.69765
agmT	1.34336
agmT	1.98284
agmT	2.08979
agmT	1.14877
agmT	1.16399
agmT	1.12815
agmT	1.20051
agmT	1.15623
agmT	1.18288
agmT	1.96301
agmT	2.05016
agmT	1.90013
agmT	1.1302
agmT	1.97
agmT	1.89991
agmT	1.18355
agmT	1.14572
agmT	1.90264
agmT	1.19721
agmT	2.19088
agmT	1.6557
agmT	1.1464
agmT	1.19984
agmT	2.19147
agmT	1.39194
agmT	1.11249
agmT	1.13045
agmT	2.14762
agmT	1.142
agmT	1.13675
agmT	1.20058
agmT	1.21347
agmT	1.19806
agmT	1.1833
agmT	1.22562
agmT	1.20514
agmT	1.81
agmT	1.23544
agmT	1.2201
agmT	2.21
agmT	1.12394
agmT	2.2368
agmT	1.09104
agmT	1.33238
agmT	1.33311
agmT	1.16816
agmT	2.00298
agmT	1.28015
agmT	1.28574
agmT	1.12997
agmT	1.14606
agmT	1.18155
agmT	1.15569
agmT	1.25535
agmT	1.68824
agmT	1.68869
agmT	1.78473
agmT	1.29451
agmT	1.19001
agmT	2.27524
agmT	1.45358
agmT	1.50793
agmT	1.16708
agmT	1.14234
agmT	1.16858
agmT	1.94441
agmT	2.02973
agmT	2.29358
agmT	1.23367
agmT	1.20486
agmT	1.34497
agmT	1.93871
agmT	1.17373
agmT	2.19115
agmT	1.15057
agmT	1.29563
agmT	1.39251
agmT	2.23747
agmT	1.62686
agmT	1.56225
agmT	1.1802
agmT	2.05704
agmT	1.20956
agmT	1.33697
agmT	1.3028
agmT	1.74011
agmT	1.51738		1.39778	0.335068	n=221
agmTEAEA	1.38504
agmTEAEA	1.22119
agmTEAEA	1.74988
agmTEAEA	1.12705
agmTEAEA	1.13292
agmTEAEA	1.14905
agmTEAEA	1.21806
agmTEAEA	1.41327
agmTEAEA	2.18963
agmTEAEA	1.20476
agmTEAEA	1.85415
agmTEAEA	1.7622
agmTEAEA	1.69457
agmTEAEA	1.14067
agmTEAEA	1.17395
agmTEAEA	1.91743
agmTEAEA	1.17629
agmTEAEA	1.19846
agmTEAEA	1.77905
agmTEAEA	1.14563
agmTEAEA	1.10779
agmTEAEA	2.1518
agmTEAEA	2.25751
agmTEAEA	1.17627
agmTEAEA	1.16032
agmTEAEA	1.68734
agmTEAEA	2.19763
agmTEAEA	2.35791
agmTEAEA	1.12752
agmTEAEA	1.23424
agmTEAEA	1.1769
agmTEAEA	1.19367
agmTEAEA	1.19879
agmTEAEA	1.23188
agmTEAEA	1.27241
agmTEAEA	1.21739
agmTEAEA	1.25378
agmTEAEA	1.45428
agmTEAEA	1.73158
agmTEAEA	1.11827
agmTEAEA	1.16239
agmTEAEA	1.163
agmTEAEA	1.17709
agmTEAEA	1.40107
agmTEAEA	1.77015
agmTEAEA	1.12741
agmTEAEA	1.22254
agmTEAEA	2.28598
agmTEAEA	1.63093
agmTEAEA	1.15232
agmTEAEA	1.31778
agmTEAEA	1.69535
agmTEAEA	1.68196
agmTEAEA	1.19483
agmTEAEA	1.28261
agmTEAEA	1.1831
agmTEAEA	1.18493
agmTEAEA	1.11744
agmTEAEA	1.17169
agmTEAEA	1.25925
agmTEAEA	1.27
agmTEAEA	1.22105
agmTEAEA	1.10643
agmTEAEA	1.2627
agmTEAEA	1.23119
agmTEAEA	1.11967
agmTEAEA	1.29869
agmTEAEA	1.15917
agmTEAEA	2.23
agmTEAEA	2.21502
agmTEAEA	1.11818
agmTEAEA	1.16589
agmTEAEA	1.95072
agmTEAEA	1.35609
agmTEAEA	1.65918
agmTEAEA	1.28079
agmTEAEA	1.23053
agmTEAEA	1.69082
agmTEAEA	1.22209
agmTEAEA	1.2723
agmTEAEA	1.20656
agmTEAEA	1.52055
agmTEAEA	1.23629
agmTEAEA	2.21104
agmTEAEA	1.67257
agmTEAEA	1.14494
agmTEAEA	1.75354
agmTEAEA	1.18353
agmTEAEA	1.49204
agmTEAEA	1.08161
agmTEAEA	1.11254
agmTEAEA	1.28807
agmTEAEA	1.31402
agmTEAEA	1.12892
agmTEAEA	1.32033
agmTEAEA	1.31636
agmTEAEA	1.19735
agmTEAEA	2.30936
agmTEAEA	1.24844
agmTEAEA	1.23237
agmTEAEA	1.52941
agmTEAEA	1.22863
agmTEAEA	1.50406
agmTEAEA	1.11581
agmTEAEA	1.20667
agmTEAEA	1.79578
agmTEAEA	1.19847
agmTEAEA	1.22042
agmTEAEA	1.29075
agmTEAEA	1.1193
agmTEAEA	1.16876
agmTEAEA	1.14788
agmTEAEA	1.25875
agmTEAEA	1.15553
agmTEAEA	1.40432
agmTEAEA	1.23024
agmTEAEA	1.88927
agmTEAEA	1.43607
agmTEAEA	1.19092
agmTEAEA	1.17259
agmTEAEA	1.29798
agmTEAEA	1.10327
agmTEAEA	1.26247
agmTEAEA	1.22504
agmTEAEA	1.12138
agmTEAEA	1.18915
agmTEAEA	2.19981
agmTEAEA	1.13373
agmTEAEA	1.99584
agmTEAEA	1.51119
agmTEAEA	1.17728
agmTEAEA	1.2793
agmTEAEA	1.19676
agmTEAEA	1.2007
agmTEAEA	1.22687
agmTEAEA	1.30517
agmTEAEA	1.25121
agmTEAEA	1.38012
agmTEAEA	2.30292
agmTEAEA	1.97
agmTEAEA	1.13397
agmTEAEA	1.19109
agmTEAEA	1.11511
agmTEAEA	1.18862
agmTEAEA	2.27
agmTEAEA	1.11671
agmTEAEA	2.19531
agmTEAEA	2.1864
agmTEAEA	1.1485
agmTEAEA	1.1713
agmTEAEA	1.20674
agmTEAEA	1.12513
agmTEAEA	1.52826
agmTEAEA	1.20095
agmTEAEA	1.18906
agmTEAEA	1.10765
agmTEAEA	1.2102
agmTEAEA	1.91
agmTEAEA	1.1795
agmTEAEA	1.23153
agmTEAEA	1.77907
agmTEAEA	1.17418
agmTEAEA	1.12592
agmTEAEA	2.2735
agmTEAEA	1.1609
agmTEAEA	2.39942
agmTEAEA	1.16733
agmTEAEA	1.19825
agmTEAEA	1.3011
agmTEAEA	1.21352
agmTEAEA	1.32136
agmTEAEA	1.20615
agmTEAEA	1.38743
agmTEAEA	1.3123
agmTEAEA	1.13753
agmTEAEA	1.10592
agmTEAEA	2.14335
agmTEAEA	1.36924
agmTEAEA	1.29558
agmTEAEA	1.1448
agmTEAEA	1.13134		1.39614	0.351469	n=180
D3	1.16716
D3	1.7073
D3	1.97653
D3	1.22614
D3	1.21922
D3	1.27731
D3	1.25317
D3	2.12852
D3	1.15368
D3	1.27212
D3	1.14488
D3	1.94289
D3	1.11103
D3	1.46187
D3	1.31526
D3	1.15189
D3	1.25731
D3	1.1774
D3	1.16552
D3	1.51775
D3	1.48309
D3	1.42726
D3	1.1228
D3	1.31755
D3	1.4598
D3	1.28283
D3	1.44914
D3	1.23846
D3	1.95477
D3	1.17436
D3	1.91856
D3	1.37492
D3	1.18249
D3	1.32278
D3	1.27357
D3	1.20425
D3	1.20992
D3	1.42893
D3	1.17896
D3	1.28525
D3	1.22668
D3	2.16992
D3	1.60813
D3	1.14411
D3	1.16716
D3	1.17008
D3	1.23161
D3	1.20337
D3	1.85472
D3	2.03088
D3	1.34768
D3	2.38993
D3	1.21826
D3	1.27721
D3	1.54553
D3	1.46444
D3	1.48703
D3	1.21182
D3	2.1599
D3	1.56965
D3	1.73003
D3	1.19206
D3	1.18694
D3	1.25607
D3	1.7462
D3	1.96804
D3	1.55918
D3	1.2012
D3	1.2259
D3	1.23465
D3	1.31788
D3	1.47477
D3	1.2337
D3	1.88428
D3	1.14613
D3	1.23275
D3	1.20795
D3	1.39613
D3	1.18997
D3	1.94152
D3	1.15188
D3	1.2342
D3	1.29695
D3	1.2541
D3	1.77609
D3	1.65867
D3	1.26908
D3	1.23473
D3	1.27852
D3	1.52289
D3	1.22404
D3	1.28256
D3	1.35572
D3	1.21036
D3	1.52897
D3	1.74234
D3	1.24623
D3	1.53806
D3	1.30377
D3	1.27915
D3	1.1968
D3	1.19107
D3	1.16261
D3	1.22094
D3	1.15525
D3	1.34524
D3	1.18996
D3	1.67266
D3	1.53052
D3	1.48265
D3	1.32224
D3	1.15337
D3	1.82107
D3	1.1924
D3	1.3285
D3	1.2137
D3	1.32195
D3	1.24201
D3	2.18024
D3	1.35465
D3	1.93646
D3	1.31395
D3	1.4233
D3	1.99649
D3	1.25676
D3	1.53578
D3	1.26966
D3	1.10316
D3	1.11667
D3	1.37593
D3	1.33435
D3	1.33021
D3	1.99169
D3	1.91538
D3	1.30055
D3	1.89703
D3	2.01405
D3	1.147
D3	1.23636
D3	1.11124
D3	1.4477
D3	1.10662
D3	1.15555
D3	2.29832
D3	1.31985
D3	1.28968
D3	1.82031
D3	1.77944
D3	1.26671
D3	1.43083
D3	1.17189
D3	1.16416
D3	1.27223
D3	1.25154
D3	1.13593
D3	1.22809
D3	1.2321
D3	1.19946
D3	1.91833
D3	1.17569
D3	1.26555
D3	1.16041
D3	1.54315
D3	1.17772
D3	1.26089
D3	1.20022
D3	1.20873
D3	1.28566
D3	1.25209
D3	1.21884
D3	1.24967
D3	1.35748
D3	1.27635
D3	1.27519
D3	1.22054
D3	1.24791
D3	1.29121
D3	1.17688
D3	1.2336
D3	1.18496
D3	1.23709
D3	1.18579
D3	1.24735
D3	2.36413
D3	2.15755
D3	1.28619
D3	1.11385
D3	1.21028
D3	1.18589
D3	1.24064
D3	1.24941
D3	1.19142
D3	1.31591
D3	1.29215
D3	1.26115
D3	1.93705
D3	1.49173
D3	1.89742
D3	1.18029
D3	1.52702
D3	1.37145
D3	1.34377
D3	1.34573
D3	1.74599
D3	1.93448
D3	1.22642
D3	1.19112
D3	1.15861
D3	1.22494
D3	1.31022
D3	1.13141
D3	1.16164
D3	1.19438
D3	1.18895
D3	1.41226
D3	1.20954
D3	1.23042
D3	1.25811
D3	1.83542
D3	1.38371
D3	1.25393
D3	1.16702
D3	1.25038
D3	1.18666
D3	1.10843
D3	1.57127
D3	1.93422
D3	1.31513
D3	1.19465
D3	1.16164
D3	1.27146
D3	1.11282
D3	1.24077
D3	1.13099
D3	1.27637
D3	1.30121
D3	1.23734
D3	1.20058
D3	1.28189
D3	1.18492
D3	1.19015
D3	1.34735
D3	2.15927
D3	1.95673
D3	1.28042
D3	1.42099
D3	1.24468
D3	1.24488
D3	2.15379
D3	1.4302
D3	1.17507
D3	1.30069
D3	1.16958
D3	1.27564
D3	1.24467
D3	1.29377
D3	1.28231
D3	2.11028
D3	1.48664
D3	1.32614
D3	1.52612
D3	1.35374
D3	1.92449
D3	2.01576
D3	1.92864
D3	2.20967
D3	1.83981
D3	1.22568
D3	1.36577
D3	1.72916
D3	1.38418
D3	1.3045
D3	1.32741
D3	1.37494
D3	1.13481
D3	1.13633
D3	1.14101
D3	1.15382
D3	1.84024
D3	1.86555
D3	1.24736
D3	1.20651
D3	1.37357
D3	1.30322
D3	1.20403
D3	1.24363
D3	1.95818
D3	1.14425
D3	1.99161
D3	1.13869
D3	1.25032
D3	1.20083
D3	1.21576
D3	1.3415
D3	1.33886
D3	1.43268
D3	1.25503
D3	1.83036
D3	1.94651
D3	1.25053
D3	1.24745
D3	1.21763
D3	1.25286
D3	1.19337
D3	2.15056
D3	1.28333
D3	1.20928
D3	1.21539
D3	2.20344
D3	1.18699
D3	1.89288
D3	1.16906
D3	1.4641
D3	1.19774
D3	1.17431
D3	1.40203
D3	1.26557
D3	1.3517
D3	1.27363
D3	1.29494
D3	1.40303
D3	1.25226
D3	1.96708
D3	1.30747
D3	1.36207
D3	1.24297
D3	1.10449
D3	1.13169
D3	1.18029
D3	1.48638
D3	1.27046
D3	2.15195
D3	1.30827
D3	1.48346
D3	1.27903
D3	1.22959
D3	1.29542
D3	2.15846
D3	1.28682
D3	1.32722
D3	1.32508
D3	1.28512
D3	1.15576
D3	1.65191
D3	2.08491
D3	1.16792
D3	2.06735
D3	1.21326
D3	1.13818
D3	1.27194		1.39869	0.295176	n=349
agmT MltG	1.15323
agmT MltG	1.19717
agmT MltG	1.35169
agmT MltG	2.02735
agmT MltG	2.21653
agmT MltG	1.18805
agmT MltG	1.16932
agmT MltG	1.26185
agmT MltG	1.31888
agmT MltG	1.25687
agmT MltG	1.55222
agmT MltG	1.71738
agmT MltG	1.43854
agmT MltG	1.75213
agmT MltG	1.87174
agmT MltG	1.24949
agmT MltG	1.16607
agmT MltG	1.43471
agmT MltG	1.52061
agmT MltG	1.26273
agmT MltG	1.40944
agmT MltG	1.2754
agmT MltG	1.45263
agmT MltG	2.18923
agmT MltG	1.24141
agmT MltG	1.57046
agmT MltG	1.27824
agmT MltG	1.19396
agmT MltG	1.24155
agmT MltG	1.45308
agmT MltG	1.2408
agmT MltG	1.34293
agmT MltG	1.41382
agmT MltG	1.22555
agmT MltG	1.49826
agmT MltG	1.17145
agmT MltG	1.43354
agmT MltG	1.37564
agmT MltG	1.66048
agmT MltG	1.21415
agmT MltG	1.192
agmT MltG	1.22109
agmT MltG	1.17366
agmT MltG	1.14319
agmT MltG	1.67615
agmT MltG	1.53263
agmT MltG	1.22163
agmT MltG	1.52386
agmT MltG	1.29111
agmT MltG	1.43395
agmT MltG	1.15947
agmT MltG	1.18815
agmT MltG	1.71449
agmT MltG	1.19532
agmT MltG	1.56236
agmT MltG	1.21586
agmT MltG	1.67539
agmT MltG	1.24328
agmT MltG	1.29118
agmT MltG	1.24762
agmT MltG	1.81074
agmT MltG	1.32969
agmT MltG	1.2884
agmT MltG	1.2085
agmT MltG	1.22182
agmT MltG	1.2239
agmT MltG	1.27092
agmT MltG	1.1967
agmT MltG	1.27608
agmT MltG	1.38099
agmT MltG	1.22622
agmT MltG	1.19906
agmT MltG	1.38786
agmT MltG	1.23763
agmT MltG	1.55264
agmT MltG	1.59354
agmT MltG	1.19807
agmT MltG	1.19276
agmT MltG	1.25395
agmT MltG	1.55355
agmT MltG	1.27951
agmT MltG	1.54863
agmT MltG	1.34796
agmT MltG	1.43704
agmT MltG	1.34076
agmT MltG	1.31935
agmT MltG	1.30003
agmT MltG	1.17382
agmT MltG	1.16151
agmT MltG	1.23286
agmT MltG	1.67908
agmT MltG	1.18748
agmT MltG	1.32389
agmT MltG	1.23802
agmT MltG	1.16009
agmT MltG	1.41305
agmT MltG	1.69722
agmT MltG	2.06601
agmT MltG	1.44783
agmT MltG	1.33139
agmT MltG	1.19411
agmT MltG	1.54605
agmT MltG	1.28499
agmT MltG	1.3329
agmT MltG	1.6587
agmT MltG	1.28408
agmT MltG	1.77684
agmT MltG	1.51629
agmT MltG	1.29055
agmT MltG	1.11665
agmT MltG	1.22503
agmT MltG	1.25894
agmT MltG	1.76771
agmT MltG	1.13998
agmT MltG	1.20876
agmT MltG	1.2478
agmT MltG	1.13294
agmT MltG	1.16543
agmT MltG	1.31597
agmT MltG	1.17747
agmT MltG	1.20549
agmT MltG	1.73304
agmT MltG	1.24184
agmT MltG	1.28869
agmT MltG	1.27326
agmT MltG	1.3173
agmT MltG	1.56332
agmT MltG	1.54361
agmT MltG	1.82295
agmT MltG	1.26564
agmT MltG	1.44003
agmT MltG	1.50367
agmT MltG	1.6479
agmT MltG	1.64193
agmT MltG	1.32784
agmT MltG	1.36482
agmT MltG	1.22816
agmT MltG	1.16931
agmT MltG	1.66031
agmT MltG	1.31744
agmT MltG	1.53744
agmT MltG	1.50798
agmT MltG	1.30216
agmT MltG	1.18805
agmT MltG	1.17457
agmT MltG	1.17005
agmT MltG	1.14397
agmT MltG	1.20088
agmT MltG	1.18158
agmT MltG	1.99368
agmT MltG	1.3629
agmT MltG	1.40559
agmT MltG	1.28859
agmT MltG	1.18692
agmT MltG	1.28801
agmT MltG	1.20423
agmT MltG	1.21227
agmT MltG	1.36827
agmT MltG	1.18944
agmT MltG	1.36285
agmT MltG	1.2409
agmT MltG	1.41416
agmT MltG	1.45145
agmT MltG	1.51447
agmT MltG	1.14893
agmT MltG	1.22154
agmT MltG	2.08135
agmT MltG	1.23424
agmT MltG	1.25494
agmT MltG	1.14922
agmT MltG	1.26795
agmT MltG	1.52332
agmT MltG	1.40119
agmT MltG	1.38025
agmT MltG	1.8057
agmT MltG	1.1763
agmT MltG	1.31106
agmT MltG	1.50309
agmT MltG	1.27807
agmT MltG	1.15943
agmT MltG	1.13951
agmT MltG	1.3476
agmT MltG	1.19796
agmT MltG	1.6691
agmT MltG	1.28527
agmT MltG	1.27568
agmT MltG	1.23693
agmT MltG	1.2244
agmT MltG	1.23931
agmT MltG	1.18923
agmT MltG	1.42269
agmT MltG	1.22009
agmT MltG	1.95275
agmT MltG	1.23792
agmT MltG	1.36069
agmT MltG	2.40271
agmT MltG	1.17982
agmT MltG	1.29818
agmT MltG	1.21487
agmT MltG	1.24368
agmT MltG	1.48032
agmT MltG	1.62244
agmT MltG	1.38237
agmT MltG	1.18228
agmT MltG	1.24522
agmT MltG	1.44081
agmT MltG	1.44764
agmT MltG	1.20093
agmT MltG	1.35173
agmT MltG	1.21134
agmT MltG	1.30476
agmT MltG	1.4313
agmT MltG	1.18484
agmT MltG	1.393
agmT MltG	1.13177
agmT MltG	1.09222
agmT MltG	1.30866
agmT MltG	1.226
agmT MltG	1.72954
agmT MltG	2.13672
agmT MltG	1.14025
agmT MltG	1.2736
agmT MltG	1.44881
agmT MltG	1.15983
agmT MltG	1.23094
agmT MltG	1.7533
agmT MltG	1.25146
agmT MltG	1.24994
agmT MltG	1.44977
agmT MltG	1.17499
agmT MltG	1.20399
agmT MltG	1.16995
agmT MltG	1.18847
agmT MltG	1.27078
agmT MltG	1.31879
agmT MltG	2.02868
agmT MltG	1.23716
agmT MltG	1.17258
agmT MltG	1.41305
agmT MltG	1.25201
agmT MltG	1.3228
agmT MltG	1.18692
agmT MltG	1.35152
agmT MltG	1.37319
agmT MltG	1.16493
agmT MltG	1.21628
agmT MltG	1.16908
agmT MltG	1.19596
agmT MltG	1.22535
agmT MltG	1.21099
agmT MltG	1.11601
agmT MltG	1.40711
agmT MltG	1.46159
agmT MltG	1.20172
agmT MltG	1.31396
agmT MltG	2.14021
agmT MltG	1.14177
agmT MltG	1.33284
agmT MltG	1.71343
agmT MltG	1.29123
agmT MltG	1.19029
agmT MltG	1.28642
agmT MltG	1.15369
agmT MltG	1.21758
agmT MltG	1.22539
agmT MltG	1.45108
agmT MltG	1.18141
agmT MltG	1.54226
agmT MltG	1.45533
agmT MltG	1.30001
agmT MltG	1.27136
agmT MltG	1.77009
agmT MltG	1.1426
agmT MltG	1.04509
agmT MltG	1.73828
agmT MltG	1.91112
agmT MltG	1.2414
agmT MltG	1.20293
agmT MltG	1.50133
agmT MltG	1.61012
agmT MltG	1.35959
agmT MltG	1.31904
agmT MltG	1.22519
agmT MltG	1.75964
agmT MltG	1.21157
agmT MltG	1.37889
agmT MltG	1.19384
agmT MltG	1.58159
agmT MltG	1.79552
agmT MltG	1.41111
agmT MltG	1.27269
agmT MltG	1.17776
agmT MltG	1.17805
agmT MltG	1.16641
agmT MltG	1.99191
agmT MltG	1.22103
agmT MltG	1.18762
agmT MltG	1.23256
agmT MltG	1.69983
agmT MltG	2.27605
agmT MltG	1.19587
agmT MltG	1.18109
agmT MltG	1.37863
agmT MltG	2.26559
agmT MltG	1.46549
agmT MltG	1.19118
agmT MltG	1.25871
agmT MltG	1.25549
agmT MltG	1.27483
agmT MltG	1.20108
agmT MltG	1.20659
agmT MltG	2.03788
agmT MltG	1.36528
agmT MltG	1.23905
agmT MltG	1.42902
agmT MltG	1.42281
agmT MltG	1.26105
agmT MltG	2.14549
agmT MltG	0.964342
agmT MltG	1.92561
agmT MltG	1.67901
agmT MltG	1.12066
agmT MltG	1.14135
agmT MltG	1.48686
agmT MltG	2.21797
agmT MltG	1.2308
agmT MltG	1.25145
agmT MltG	1.54218
agmT MltG	1.41539
agmT MltG	1.42319
agmT MltG	2.03645
agmT MltG	1.19264
agmT MltG	1.26808
agmT MltG	1.32575
agmT MltG	1.19079
agmT MltG	1.28164
agmT MltG	1.15129
agmT MltG	1.17182
agmT MltG	1.31064
agmT MltG	1.19502
agmT MltG	1.96785
agmT MltG	1.94998
agmT MltG	1.18196
agmT MltG	1.48782
agmT MltG	1.16544
agmT MltG	1.25266
agmT MltG	2.2157
agmT MltG	2.10982
agmT MltG	1.70716
agmT MltG	1.29748
agmT MltG	1.3405
agmT MltG	1.27358
agmT MltG	1.68157
agmT MltG	1.78814
agmT MltG	1.20025
agmT MltG	1.37718
agmT MltG	1.19969
agmT MltG	1.29488
agmT MltG	1.27793
agmT MltG	1.64978
agmT MltG	2.20313
agmT MltG	1.19454
agmT MltG	1.25952
agmT MltG	1.38405
agmT MltG	1.85176
agmT MltG	1.32183
agmT MltG	1.13591
agmT MltG	1.30069
agmT MltG	1.13537
agmT MltG	1.31398
agmT MltG	2.11938
agmT MltG	1.25976
agmT MltG	1.31651
agmT MltG	1.39057
agmT MltG	1.14122
agmT MltG	1.66567
agmT MltG	1.48822
agmT MltG	1.14236
agmT MltG	1.41511
agmT MltG	1.2791
agmT MltG	1.40394
agmT MltG	1.44236
agmT MltG	1.17712
agmT MltG	1.21329
agmT MltG	1.34141
agmT MltG	1.64732
agmT MltG	1.33756
agmT MltG	1.72726
agmT MltG	1.34652
agmT MltG	1.87267
agmT MltG	1.23219
agmT MltG	1.35766
agmT MltG	1.13335
agmT MltG	1.34421
agmT MltG	1.98443
agmT MltG	1.38442
agmT MltG	1.25254
agmT MltG	1.23711
agmT MltG	1.27227
agmT MltG	1.8398
agmT MltG	1.29329
agmT MltG	2.08102
agmT MltG	1.09434
agmT MltG	1.1686
agmT MltG	1.50484
agmT MltG	1.18081
agmT MltG	1.20011
agmT MltG	1.20173
agmT MltG	1.23412
agmT MltG	1.17693
agmT MltG	1.32008
agmT MltG	1.36459
agmT MltG	1.20762
agmT MltG	1.24819
agmT MltG	1.15781
agmT MltG	1.47079
agmT MltG	1.89652
agmT MltG	1.47927
agmT MltG	1.85919
agmT MltG	1.17274
agmT MltG	1.70227
agmT MltG	1.58681
agmT MltG	1.245
agmT MltG	1.85199
agmT MltG	1.61323
agmT MltG	1.20595
agmT MltG	1.26782
agmT MltG	1.21201
agmT MltG	1.60098
agmT MltG	1.12276
agmT MltG	1.27235
agmT MltG	1.19791
agmT MltG	1.35062
agmT MltG	1.71241
agmT MltG	1.25332
agmT MltG	1.45911
agmT MltG	1.4633
agmT MltG	1.72489
agmT MltG	1.21982
agmT MltG	1.37322
agmT MltG	1.08532
agmT MltG	1.68266
agmT MltG	1.33767
agmT MltG	1.3757
agmT MltG	1.91127
agmT MltG	1.47374
agmT MltG	1.60605
agmT MltG	1.39209
agmT MltG	1.15165
agmT MltG	1.21585
agmT MltG	1.33482
agmT MltG	1.40324
agmT MltG	1.64955
agmT MltG	1.25111
agmT MltG	1.87585
agmT MltG	1.52861
agmT MltG	1.54217
agmT MltG	2.02881
agmT MltG	1.36619
agmT MltG	1.25588
agmT MltG	1.14504
agmT MltG	1.35652
agmT MltG	1.22076
agmT MltG	1.18779
agmT MltG	1.22981
agmT MltG	1.26766
agmT MltG	1.77548
agmT MltG	2.07207
agmT MltG	1.18712
agmT MltG	1.24043
agmT MltG	1.17081
agmT MltG	1.18707
agmT MltG	1.755
agmT MltG	1.15377
agmT MltG	1.39415
agmT MltG	1.28754
agmT MltG	1.39794
agmT MltG	1.68886
agmT MltG	1.95578
agmT MltG	1.23629
agmT MltG	1.18242
agmT MltG	1.35341
agmT MltG	1.19978
agmT MltG	1.23125
agmT MltG	1.22852
agmT MltG	1.29899
agmT MltG	1.31582
agmT MltG	1.7072
agmT MltG	1.32369
agmT MltG	1.35943
agmT MltG	1.33296
agmT MltG	1.17724
agmT MltG	1.54068
agmT MltG	1.19757
agmT MltG	2.39628
agmT MltG	1.57965
agmT MltG	2.32413
agmT MltG	1.24444
agmT MltG	1.09387
agmT MltG	1.34962
agmT MltG	1.50438
agmT MltG	1.20226
agmT MltG	1.25896
agmT MltG	1.28447
agmT MltG	1.15346
agmT MltG	1.14549
agmT MltG	1.30634
agmT MltG	1.84944
agmT MltG	1.43707
agmT MltG	1.38183
agmT MltG	1.40913
agmT MltG	1.17025
agmT MltG	1.25118
agmT MltG	1.19195
agmT MltG	1.26825
agmT MltG	1.57248
agmT MltG	1.26848
agmT MltG	1.29219
agmT MltG	1.36657
agmT MltG	1.19566
agmT MltG	1.38886
agmT MltG	1.17661
agmT MltG	1.52416
agmT MltG	1.36755
agmT MltG	1.61438
agmT MltG	1.16923
agmT MltG	1.27529
agmT MltG	1.99911
agmT MltG	1.26261
agmT MltG	2.03887
agmT MltG	1.18484
agmT MltG	1.99424
agmT MltG	1.43366
agmT MltG	1.68621
agmT MltG	1.15892
agmT MltG	1.34543
agmT MltG	1.27169
agmT MltG	1.3827
agmT MltG	1.18165
agmT MltG	1.20117
agmT MltG	1.21686
agmT MltG	1.44194
agmT MltG	1.19502
agmT MltG	1.30414
agmT MltG	1.66819
agmT MltG	1.24041
agmT MltG	1.32214
agmT MltG	1.15047
agmT MltG	1.47321
agmT MltG	1.51899
agmT MltG	1.2525
agmT MltG	1.36368
agmT MltG	1.14802
agmT MltG	1.24571
agmT MltG	1.65727
agmT MltG	1.59542
agmT MltG	1.11668
agmT MltG	1.76555
agmT MltG	1.17997
agmT MltG	1.79885
agmT MltG	1.26849
agmT MltG	1.26128
agmT MltG	1.78842
agmT MltG	1.27521
agmT MltG	1.3508		1.39101	0.258796	n=564
agmTEAEA MltG	1.6585
agmTEAEA MltG	2.44284
agmTEAEA MltG	1.29896
agmTEAEA MltG	2.58086
agmTEAEA MltG	1.42718
agmTEAEA MltG	1.17285
agmTEAEA MltG	1.72468
agmTEAEA MltG	1.43335
agmTEAEA MltG	1.23368
agmTEAEA MltG	1.29498
agmTEAEA MltG	1.2593
agmTEAEA MltG	1.75837
agmTEAEA MltG	1.31897
agmTEAEA MltG	1.45902
agmTEAEA MltG	1.46604
agmTEAEA MltG	1.31963
agmTEAEA MltG	1.92808
agmTEAEA MltG	1.7718
agmTEAEA MltG	1.14553
agmTEAEA MltG	1.21593
agmTEAEA MltG	1.31957
agmTEAEA MltG	1.57261
agmTEAEA MltG	1.44879
agmTEAEA MltG	1.34791
agmTEAEA MltG	1.21267
agmTEAEA MltG	2.12017
agmTEAEA MltG	1.48796
agmTEAEA MltG	2.15331
agmTEAEA MltG	1.06408
agmTEAEA MltG	1.26457
agmTEAEA MltG	1.39857
agmTEAEA MltG	1.25776
agmTEAEA MltG	1.22243
agmTEAEA MltG	1.26258
agmTEAEA MltG	1.42312
agmTEAEA MltG	1.38672
agmTEAEA MltG	1.21396
agmTEAEA MltG	1.48083
agmTEAEA MltG	1.33651
agmTEAEA MltG	1.35949
[truncated: 516 more rows]
